1 **Original research: Biofilms and core pathogens shape the tumour**  
2 **microenvironment and immune phenotype in colorectal cancer**

3

4 Lasse Kvich<sup>1,2,7</sup>, Blaine Gabriel Fritz<sup>2,7</sup>, Henrike Zschach<sup>3</sup>, Thilde Terkelsen<sup>3</sup>, Hans Raskov<sup>1</sup>,  
5 Kathrine Høst-Rasmussen<sup>1</sup>, Morten Ragn Jakobsen<sup>1</sup>, Alexandra Gabriella Gheorghe<sup>4</sup>, Ismail  
6 Gögenur<sup>1,5,8,\*</sup>, and Thomas Bjarnsholt<sup>2,6,8,\*</sup>

7

8 <sup>1</sup> Center for Surgical Science, Department of Surgery, Zealand University Hospital, Køge,  
9 Region Zealand, 4690, Denmark.

10 <sup>2</sup> Costerton Biofilm Center, Department of Immunology and Microbiology, University of  
11 Copenhagen, Copenhagen, The Capital Region, 2200, Denmark.

12 <sup>3</sup> Center for Health Data Science, University of Copenhagen, Copenhagen, The Capital Region,  
13 2200, Denmark.

14 <sup>4</sup> Department of Forensic Medicine, Faculty of Health and Medical Sciences, University of  
15 Copenhagen, Copenhagen, The Capital Region, 2100, Denmark.

16 <sup>5</sup> Department of Clinical Medicine, University of Copenhagen, The Capital Region, 2200,  
17 Copenhagen, Denmark.

18 <sup>6</sup> Department of Clinical Microbiology, Rigshospitalet, Copenhagen, The Capital Region, 2100,  
19 Denmark.

20 <sup>7</sup> These authors contributed equally to this work, and the co-first authors agreed upon the order.

21 <sup>8</sup> Senior author

22 \* Corresponding authors: Thomas Bjarnsholt [Tbjarnsholt@sund.ku.dk](mailto:Tbjarnsholt@sund.ku.dk) & Ismail Gögenur  
23 [igo@regionsjaelland.dk](mailto:igo@regionsjaelland.dk)

24

25 **Keywords:** colorectal cancer (CRC); biofilms; *Fusobacterium nucleatum*; *Bacteroides fragilis*;  
26 *In Situ* Hybridization, Fluorescence; Sequence Analysis, RNA

27

## 28 **ABSTRACT**

29 **Objective** Growing evidence links bacterial dysbiosis with colorectal cancer (CRC)  
30 carcinogenesis, characterized by an increased presence of core pathogens such as *Bacteroides*  
31 *fragilis* and *Fusobacterium nucleatum*. Here, we characterized the *in situ* biogeography and  
32 transcriptional interactions between bacteria and the host in mucosal colon biopsies.

33 **Design** The influence of CRC core pathogens and biofilms on the tumour microenvironment  
34 (TME) was investigated in biopsies from patients with and without CRC (paired normal tissue  
35 and healthy tissue biopsies) using fluorescence *in situ* hybridization and dual-RNA sequencing.

36 **Results** Tissue-invasive, mixed-species biofilms enriched for *B. fragilis* and *F. nucleatum* were  
37 observed in CRC tissue, especially in right-sided tumours. *Fusobacterium spp.* was associated  
38 with increased bacterial biomass and inflammatory response in CRC samples. CRC samples  
39 with high bacterial activity demonstrated increased expression of pro-inflammatory cytokines,  
40 defensins, matrix-metalloproteases, and immunomodulatory factors. In contrast, the gene  
41 expression profiles of CRC samples with low bacterial activity resembled healthy tissue  
42 samples. Moreover, immune cell profiling showed that *B. fragilis* and *F. nucleatum* modulated  
43 the TME and correlated with increased infiltration of neutrophils and CD4<sup>+</sup> T-cells. Overall,  
44 bacterial activity was critical for the immune phenotype and correlated with the infiltration of  
45 several immune cell subtypes, including M2 macrophages and regulatory T-cells.

46 **Conclusion** Biofilms and core pathogens shape the TME and immune phenotype in CRC. Our  
47 results support that *Fusobacterium spp.* may provide a future therapeutic target to reduce  
48 biofilms and the inflammatory response in the TME while highlighting the importance of  
49 widening the scope of bacterial pathogenesis in CRC beyond core pathogens.

## 50 INTRODUCTION

51 Several studies demonstrate associations between altered gut microbiota composition and  
52 colorectal cancer (CRC) <sup>1-3</sup>. This imbalance in the gut microbiota is termed microbial dysbiosis,  
53 and it is considered to contribute to CRC pathogenesis <sup>4,5</sup>. Microbial dysbiosis allows  
54 opportunistic bacteria, such as *Bacteroides fragilis* and *Fusobacterium nucleatum*, to accumulate  
55 and increase inflammation, a known risk factor for CRC <sup>6,7</sup>. The mechanisms whereby bacteria  
56 accelerate carcinogenesis have been explored in numerous *in vitro* and animal studies, where  
57 specific bacterial species influence pathways related to the initiation and progression of CRC <sup>8</sup>.  
58 Specifically, *B. fragilis* and *F. nucleatum* can alter the tumour microenvironment (TME) and  
59 facilitate CRC progression by fueling an inflammatory response <sup>9,10</sup> and suppressing anti-  
60 tumourigenic immune cells <sup>11-13</sup>. However, mechanistic insights from animal experiments or *in*  
61 *vitro* studies do not adequately characterize the bacteria and host interplay <sup>14</sup>. Recently,  
62 metatranscriptomic studies have investigated the bacteria and host interplay in infectious  
63 diseases <sup>15,16</sup>, but metatranscriptomic studies in CRC are still scarce <sup>17,18</sup>.

64 In this study, we characterize the interplay between the host and active mucosa-associated  
65 bacteria in CRC, paired normal, and healthy tissue using fluorescence *in situ* hybridization and  
66 dual-RNA sequencing. Species-specific and pan-microbial microscopic examination of cross-  
67 sectioned whole biopsies revealed the involvement of *Fusobacterium spp.* in the accumulation of  
68 bacterial biomass (biofilms) and acute inflammation in CRC samples. Further, immune cell  
69 profiling revealed that overall bacterial activity and *B. fragilis* and *F. nucleatum* activity  
70 correlated with the infiltration of specific immune cells. Our findings show that biofilms and  
71 CRC core pathogens fuel the inflammatory response in the TME and suggest *Fusobacterium*  
72 *spp.* as a therapeutic target to reduce inflammation-driven CRC carcinogenesis.

73

## 74 **MATERIALS AND METHODS**

### 75 **Ethics and patient recruitment**

76 Patients were recruited at Zealand University Hospital from December 2020 to December 2021.

77 Inclusion criteria were persons >18 years old with written, approved consent admitted for a

78 colonoscopy exam or patients undergoing surgery. Subjects were divided into patients with

79 pathologically verified CRC (any T-stage) and healthy persons with no underlying

80 gastrointestinal malignancies or diseases. No other inclusion or exclusion criteria were used.

81 This study was approved by the Danish Regional Ethical Committee (SJ-826) and the Danish

82 Data Protection Agency (REG-024-2020).

83

### 84 **Study design and sampling**

85 Mucosal colon biopsies were collected from 40 patients with pathologically verified CRC (any

86 T-stage) for RNA sequencing and microscopy. Biopsies were collected from the tumour and

87 paired normal tissue >10 cm away from the tumour, if possible. Mucosal colon biopsies were

88 also collected from 40 individuals with no observed gastrointestinal diseases as healthy control

89 samples. Biopsies were sampled from anatomically different areas of the colon (right and left-

90 sided). An even amount of left and right-sided samples was ensured between patients with CRC

91 and individuals with no observed gastrointestinal diseases. A pathologist screened CRC biopsies

92 to ensure the presence of carcinoma. After collection, biopsies for RNA sequencing were placed

93 immediately in RNAlater® (Invitrogen, MA, USA) and stored for a minimum of 18-24 hours at

94 5 °C before further processing. Samples were centrifuged at 3000 x g for 5 minutes, the

95 RNAlater® was removed, and the tissue was stored at -80 °C until RNA purification. For

96 microscopy analysis, two biopsies were collected per person (CRC and healthy) and area of  
97 sampling (tumour and paired normal tissue). Biopsies were fixated immediately in 4% buffered  
98 paraformaldehyde (pH 7.4) and stored at 4° C for at least 24 hours before being embedded in  
99 paraffin (FFPE).

100

### 101 **FISH probes**

102 Peptide Nucleic Acid (PNA) probes targetting *B. fragilis* (Bfrag-998)<sup>19</sup> and *F. nucleatum*  
103 (FUS714)<sup>20</sup> were ordered from Biomers (Ulm, DE). Bfrag-998 was tagged at the 5'end with  
104 Cyanine5 (Cy5-5'-GTTTCCACATCATTCCTG-3') and FUS714 was tagged at the 5'end  
105 with Cyanine3 (Cy3-5'-GGCTTCCCCATCGGCATT-3'). A universal (BacUni) bacterial probe  
106 (AdvanDx, Woburn, MA) tagged at the 5'end with Texas Red was used to visualize all bacteria.  
107 The specificity of Bfrag-998 and FUS714 was checked with the Basic Local Alignment Search  
108 Tool (BLAST) function in the NCBI database. The FUS714 probe aligned with other  
109 *Fusobacterium* strains, including four subspecies of *Fusobacterium nucleatum* (polymorphum,  
110 nucleatum, vincentii, and animalis), and it was also complementary to two other bacterial species  
111 belonging to the Fusobacteriaceae family (*Ilyobacter polytropus* and *Propionigenium*  
112 *modestum*); thus microscopy findings are referred to as *Fusobacterium spp.* The Bfrag-998  
113 probe was specific for *B. fragilis*.

114

### 115 **Peptide nucleic acid fluorescence *in situ* hybridization (PNA-FISH)**

116 FFPE samples were sectioned onto glass slides (3-5 µm sections) before standard xylene-  
117 deparaffinization. Each glass slide had two sections with two biopsies per person. PNA-FISH  
118 was carried out according to a standard in-house protocol with few adjustments<sup>21</sup>. The

119 hybridization buffer was prepared according to Stender *et al.*<sup>22</sup> with a final concentration of 250  
120 nM for each probe. Samples were covered with 30  $\mu$ L hybridizations buffer with a mixture of  
121 either all three probes or the specific probes (Bfrag-998 and FUS714) and left for incubation for  
122 one and a half hours at 56° C. Samples were then washed in a pre-warmed (56° C) washing  
123 buffer (AdvanDx, USA) for 30 minutes and left to dry for 15 minutes. Samples were  
124 counterstained with 0.3  $\mu$ M 4',6-diamidino-2-phenylindole (DAPI; Life Technologies, OR,  
125 USA) for 15 minutes before rinsing with cold phosphate-buffered saline pH = 7.5 (Panum  
126 Institute Substrate Department, University of Copenhagen, DK). The samples were left to dry  
127 before an antifade reagent was applied (ProLong<sup>TM</sup> Gold, Thermo Fisher Scientific, UK).  
128 Finally, a cover glass (Marienfeld, DE) was added and sealed with clear nail polish.

129

### 130 **Microscopy and image processing**

131 All fluorescence microscopy was performed on an inverted Zeiss LSM 880 confocal microscope  
132 (Zeiss, Jena, DE), using either a Plan-Apochromat 63x/1.40 Oil DIC M27 objective or an EC  
133 Plan-Neofluar 40x/1.30 Oil DIC M27 objective. All images were obtained in 16-bit, and the  
134 instrument automatically assigned the optimal pinhole size (Airy units) for each analysis  
135 described below. Illustrative images were processed with maximum intensity projection and a  
136 Gaussian filter for smoothing, and the brightness was increased by 20% for presentation  
137 purposes. All illustrative images were processed in the Imaris 9.7.2 software (Oxford  
138 Instruments, UK), either as 3D projections (bacterial biomass) or 2D projections (illustrative  
139 images). In addition, pseudo-colouring was used for representative images to separate different  
140 bacterial populations from each other. *Fusobacterium spp.* were pseudo-coloured green, *B.*  
141 *fragilis* red, and all other bacteria purple.

142

### 143 **Bacterial biomass**

144 A 594 nm laser was used to excite the BacUni probe for bacterial biomass imaging, and the  
145 fluorescence emission was detected in 597–661 nm intervals. One biopsy was selected for  
146 analysis in the different groups (primary tumour, paired normal, and healthy tissue). The first  
147 biopsy encountered during microscopy was used for this analysis to avoid selection bias. Area  
148 (tile scan) and depth (z-stack) were manually set for each biopsy. Biomass ( $\mu\text{m}^3$ ) was measured  
149 as previously described <sup>23</sup>, using the Measurement Pro addon in Imaris (Oxford Instruments,  
150 UK). Imaris utilizes a pixel quantitative approach to measure biomass, where a mask was created  
151 for total biomass (tissue and bacteria) and bacterial biomass (only bacteria) according to the  
152 thresholding of fluorescence intensity.

153

### 154 **Probe validation and *B. fragilis* and *Fusobacterium spp.* prevalence**

155 The FUS714 and Bfrag-998 probes were qualitatively validated to ensure correct differentiation  
156 during microscopy. The differentiation of *Fusobacterium nucleatum ssp. nucleatum* (ATCC  
157 25586) and *Bacteroides fragilis* (ATCC 25285) were tested on spiked lung tissue explanted from  
158 a mink (surplus material from animal studies). Overnight cultures with both strains were  
159 prepared and grown in brain-heart infusion media (Sigma-Aldrich, USA) under anoxic  
160 conditions for 24 hours at 37° C, and tissue was subsequently spiked in a 1:1 ratio by injection.  
161 Afterwards, the tissue was fixated in 4% buffered paraformaldehyde, paraffin-embedded, and  
162 treated according to the PNA-FISH method described above. A 561 and 633 nm laser was used  
163 for the excitation of Cy3 (FUS714) and Cy5 (Bfrag-998), respectively. Fluorescence emission  
164 was detected in 549–573 nm intervals for FUS714 and 632-705 nm intervals for Bfrag-998.

165 After initial testing and adjustment on spiked tissue, the probes were tested *ex vivo* on tumour  
166 biopsies with similar settings to ensure the correct differentiation of bacterial populations.  
167 Two sections with two biopsies were screened per person in each group to assess the prevalence  
168 of *B. fragilis* and *Fusobacterium spp.* Excitation of DAPI was acquired at 405 nm, and the  
169 fluorescence emission was detected in 415–488 nm intervals. The settings described above were  
170 used for FUS714 and Bfrag-998. The narrow intervals for FUS714 were used to avoid  
171 background fluorescence from the tissue. Sequential multiple-channel fluorescence scanning was  
172 used to avoid or reduce bleed-through (cross talk) across the fluorophores. All findings  
173 (scattered cells or aggregated bacteria) were counted and included in the prevalence  
174 measurement. In addition, the biomass was assessed for *B. fragilis* and *Fusobacterium spp.* on a  
175 subset of samples (n = 7) using the same excitation and emission intervals described above.

176

### 177 **Histopathology and inflammation score**

178 Two pathologists evaluated the histopathology and scored inflammation in CRC samples to  
179 assess whether bacterial biomass (biofilms), *Fusobacterium spp.*, or *B. fragilis* affected the  
180 degree of inflammation. Tissue sections were cut at 4 µm thicknesses, mounted on glass  
181 slides, and stained with Hematoxylin & Eosin. The degree of inflammation was scored 0 (no  
182 inflammation), 1 (mild inflammation), 2 (moderate inflammation), and 3 (severe  
183 inflammation)<sup>24 25</sup>. A score was given for acute and chronic inflammation, reflecting the  
184 infiltration of polymorphonuclear leukocytes (PMNs) and lymphocytes, respectively. Two  
185 pathologists performed the histological assessment in a blinded way. Histological analysis was  
186 performed using a Leica DM 4000 B LED light microscope. In addition, the co-localization of



187 bacterial biomass and necrotic tissue was assessed by a pathologist in samples with high  
188 bacterial biomass (n = 21) using an EVOS M7000 microscope (ThermoFisher MA, USA).

189

### 190 **RNA extraction and purification**

191 Biopsies were removed from -80°C and placed immediately into 2 mL microtubes (Sarstedt,  
192 Nuembrecht, Germany) filled to ~1/3 volume with 2 and 0.1 mm diameter zirconia beads  
193 (Biospec, OK, USA) on ice. Eight hundred microliters of ice-cold Trizol (Invitrogen, MA, USA)  
194 containing 10 uL/mL  $\beta$ -mercaptoethanol (Sigma-Aldrich, MO, USA) was added to each tube.  
195 Samples were homogenized 3 x 30s at 7000 power in a MagnaLyzer® (Roche Diagnostics,  
196 Basel, Schweiz) and placed on ice for ~1 minute between each homogenization. One-hundred  
197 sixty microliters of chloroform (Sigma-Aldrich, MO, USA) was added, and the tubes were  
198 shaken by hand for 45 s. Samples were spun down at 13.000 x g at 4°C for 15 min. The aqueous  
199 phase was collected in a 1.5 mL Eppendorf tube. Four hundred microliters of cold isopropanol  
200 (Sigma-Aldrich, MO, USA) and 2uL of linear acrylamide (ThermoFisher, MA, USA) were  
201 added to each sample. Tubes were then inverted 4-6 times and incubated at -20 °C for 60-90  
202 minutes. Samples were spun down again as previously, and the supernatant was removed. The  
203 pellet was washed twice with 900uL of freshly prepared and ice-cold 80 % ethanol. After the  
204 second wash, the ethanol was removed, and the samples were air-dried for ~5-10 minutes to  
205 evaporate excess ethanol. The pellet was then resuspended in 20 uL of nuclease-free water. The  
206 concentration and purity of extracted RNA were assessed with a Nanodrop spectrophotometer  
207 (ThermoFisher, MA, USA). The purified RNA was stored at -80°C.

208

### 209 **Ribosomal RNA depletion**

210 Ribosomal RNA (rRNA) depletion was performed using the riboPOOL™ kit (siTOOLS Biotech,  
211 Germany). One microgram of purified RNA was used as input, if available. If one microgram in  
212 15uL water was not possible due to low concentration, 15 uL of the purified RNA was used as  
213 input. The protocol was performed as described in the riboPOOLKitManual\_V1.3. The  
214 riboPOOL used for the depletion was a 100:1 combination of the Human riboPOOL  
215 (riboPOOL\_054 ) and Pan-Prokaryote riboPOOL (riboPOOL\_003). Eighty microliters of rRNA-  
216 depleted RNA were treated with RQ1 RNase-free DNase (Promega, USA) (10uL DNase +  
217 10uL buffer) per sample and incubated for 30 min at 37°C. The rRNA-depleted and DNase-  
218 treated RNA was then cleaned with the Zymo RNA Clean and Concentrate-5 kit (Zymo  
219 Technologies, USA) and eluted in 8 uL nuclease-free water.

220

### 221 **Library preparation and sequencing**

222 One hundred nanograms of rRNA-depleted, DNase-treated RNA in 5uL water was used as input  
223 to the NEB Ultra II directional library-preparation kit (New England BioLabs, MA, USA). If the  
224 concentration was less than this, 5uL of the rRNA-depleted, DNase-treated RNA was used. The  
225 protocol was performed as described in the manual for rRNA-depleted RNA. Ten or twelve PCR  
226 cycles were used for the final enrichment step for samples with inputs of 100 ng or less,  
227 respectively. Quality and concentration of final libraries were measured by Qubit (1x dsDNA  
228 kit; Invitrogen, MA, USA) and Bioanalyzer (DNA High Sensitivity Chip; Agilent, CA, USA).  
229 Samples were pooled in equimolar amounts, cleaned with the 1.8x HighPrep™ PCR beads  
230 (Magbio, Lusanne, Schweiz), and sequenced on an Illumina NovaSeq 6000 instrument. Samples  
231 1-33 and 34-118 were sequenced in S2, and S4 flow cells, respectively, with v1.5 reagents and  
232 150 PE reads.

233

## 234 **Preliminary processing of raw RNA sequencing data**

235 Raw sequencing data (bcl. files) were demultiplexed into forward and reverse reads for each  
236 sample using bcl2fastq v2.20.0 from Illumina and concatenated across lanes. Cutadapt v3.4<sup>26</sup>  
237 was used to trim adapters and filter out short reads (maximum error rate = 0.005, minimum  
238 length = 33, minimum overlap = 7). rRNA reads were removed with sortmeRNA v4.3.4<sup>27</sup> using  
239 all of the included databases. The rRNA-depleted reads were then aligned to the human  
240 reference genome (GRCh38.p13, Ensembl release 106, primary assembly, build:  
241 GCA\_000001405.28) with bwa-mem v0.7.17<sup>28</sup>. Reads mapping to annotated, gene-level  
242 features were counted with featureCounts (parameters: `-p -O -fracOverlap 0.2 -J -t gene`) from  
243 subread v2.0<sup>29</sup> using the .gtf Ensembl annotations (GRCh38.106, Ensemble release 106).  
244 Outputted files were then concatenated by columns into a final gene-count matrix. The trimmed  
245 reads were also classified using Kraken v.2.1.2<sup>30</sup> to determine bacterial community composition  
246 using the standard RefSeq index database (obtained from: [https://benlangmead.github.io/aws-](https://benlangmead.github.io/aws-indexes/k2)  
247 [indexes/k2](https://benlangmead.github.io/aws-indexes/k2)). Abundances of actively transcribing bacteria were estimated with Bracken v2.7<sup>31</sup>.

248

## 249 **Bacterial community composition**

250 The bracken output was multiplied by a scaling factor to account for differences in sequencing  
251 depth between the two sequencing runs (Samples 1-33 and 34-118). This scaling factor was  
252 calculated as the number of reads in the sample with the lowest number divided by the number  
253 of reads in a given sample. Scaled counts were used when comparing across the samples, and  
254 unscaled counts were used when comparing within-sample variation. Also, a threshold was  
255 applied to remove noise from low-abundance taxa. The cut-off was determined by visual

256 inspection of the log-10 transformed scaled counts distribution, and the intersection between the  
257 two independent, overlapping, normal-distributed populations was used as the cut-off (Figure  
258 S1); thus, all scaled counts  $< 0.125$  were set to 0. Differences in mean scaled counts of bacteria,  
259 *F. nucleatum*, and *B. fragilis* between conditions (CRC vs. healthy, CRC vs. paired) were tested  
260 with a Wilcoxon rank-sum test or Wilcoxon signed-rank tests for paired and independent  
261 samples.

262

### 263 **Differential Gene Expression and Functional Enrichment Analysis**

264 Differential gene expression and functional enrichment analyses were performed to identify  
265 differentially expressed genes (DEGs) and pathways between CRC and Healthy/Paired-normal  
266 tissue. First, the count data were filtered to include only protein-coding transcripts using the  
267 biomaRt package in R<sup>32</sup>. A dummy variable ("cancer") for samples originating from CRC  
268 ("CRC") or Healthy/Paired-normal ("no\_CRC") was encoded. Differential gene expression  
269 analysis was performed using the DESeq function from DESeq2 v1.36.0 with default settings  
270 and the formula "~ cancer". DEGs with an adjusted p-value less than 0.05 and  $|\log_2$  fold-  
271 change $>2$  were used for further analysis. We adapted a previously published approach to test  
272 whether differentially expressed genes represented an enrichment of known biological pathways  
273<sup>33</sup>. Briefly, the Kyoto Encyclopedia of Genes and Genomes (KEGG), Pathway Interaction  
274 Database (PID), and REACTOME (a database of reactions, pathways, and biological processes)  
275 canonical data sets were downloaded from the MsigDB database. Pathways with a minimum of  
276 25 and maximum of 85 genes and overlap of at least five genes with the DEGs of interest were  
277 included. A Fisher's exact test was performed for each pathway and the resulting p-values were  
278 adjusted with Benjamini-Hochberg correction. This analysis was performed separately for genes

279 showing positive or negative log<sub>2</sub> fold changes, respectively. To analyze the effect bacteria on  
280 host gene expression in tumour tissue, the count matrix described above was further subsetted to  
281 include only CRC samples. A binary variable was then created to identify samples containing a  
282 high and low bacterial signal (defined as outliers on a scaled count, Figure S1). Differential gene  
283 expression and functional enrichment analysis were then performed as described above with this  
284 variable instead of the "cancer" variable.

285

### 286 **Immune cell profiling**

287 There are many different methods for estimating immune cell infiltration from RNA sequencing  
288 data<sup>34 35</sup>. Each of these likely return different scores due to the underlying algorithm employed  
289 by the method and its predefined immune cell populations. Therefore, a consensus approach was  
290 utilized using the R package immunedeconv<sup>36</sup>. This package implements multiple methods,  
291 including quantiseq, epic, estimate, mcp\_counter, xcell, consensus\_tme, and timer, for  
292 estimating sample immune infiltration based on bulk RNA sequencing reads. Filtering and  
293 normalization of the raw-count matrix of gene expression values were performed with limma<sup>37</sup>.  
294 Low-expressed genes were filtered out with the filterByExpr function, the scaling factor was  
295 estimated with calcNormFactors, and a matrix of TMM (Trimmed Mean of M-values) counts  
296 was generated with the cpm function. As each deconvolution method for estimating a score  
297 returns different sets/subsets of immune cell types, generalized cell categories were defined for  
298 each cell type, e.g., CD4+ and CD8+, and regulatory T-cells were classified as T-cells. Also,  
299 given that some methods (quantiseq, epic) return a proportion of a given cell type to all cells  
300 while others (mcp\_counter, xcell, consensus\_tme, timer, estimate) return scores on varying  
301 scales, the analyses were performed separated for proportions and scores. Normalization was

302 performed by positive centering of the scores to adjust for differences in scales between methods  
303 utilizing a score, adding the smallest observed score value (greater than zero) in each method as  
304 a pseudo count to scores that were 0, after which the values were log<sub>2</sub> transformed.  
305 Finally, heatmaps were generated to visualize the hierarchical clustering of samples according to  
306 the immune cell profile score. The R-packages NBclust, cluster, as well as the results from the  
307 hierarchical clustering were used to select the optimal number of clusters (n=4). A  
308 nonparametric Kruskal-Wallis test was used to test whether the total bacterial, *F. nucleatum*, or  
309 *B. fragilis* activity affected the immune cell clusters. Post-hoc, pairwise comparisons between  
310 clusters were then performed with a Dunn test.

311

## 312 **Statistics**

313 Colorectal cancer RNAseq data from The Cancer Genome Atlas <https://portal.gdc.cancer.gov>  
314 was used to estimate the required sample sizes. Based on the bacterial gene transcription, which  
315 is expectedly lower than the host, it was estimated that 40 patients should be included in each  
316 group. An alpha of 0.5 and a power of 0.8 was used. Bacterial biomass ( $\mu\text{m}^3$ ) was log-  
317 transformed (Log) to ensure normally distributed data unless otherwise stated. In some cases,  
318 CRC data were separated into high and low bacterial biomass using the average of all bacterial  
319 biomass measurements as the cut-off (4.2 Log  $\mu\text{m}^3$ ). The CRC sample with the missing paired  
320 sample was excluded from all paired analyses. Graphs and statistics were carried out with either  
321 GraphPad Prism 9.3.1 (GraphPad Software, La Jolla, California, USA) or the R software v3.6.0  
322 (R Development Core Team 2004). An adjusted p-value was reported in the case of multiple  
323 testing, and a p-value  $\leq 0.05$  was considered significant.

324

## 325 **RESULTS**

### 326 **Patient characteristics**

327 Standard osmotic bowel prep was used in all cases before sampling, and only two patients with  
328 CRC reported using antibiotics before inclusion and sampling. Patients with CRC had a higher  
329 ASA score (American Society of Anesthesiologists - a metric to determine if a patient is healthy  
330 enough to tolerate surgery and anaesthesia) than healthy persons (Table 1). This difference was  
331 expected, given the aetiology of CRC and the demographic characteristics of the CRC  
332 population. More males were diagnosed with CRC, and left-sided tumours were more prevalent  
333 than right-sided, reflecting the normal distribution of CRC. Biopsies were mainly collected from  
334 the rectum and colon sigmoideum (Figure 1A). Due to advanced disease, ten patients did not  
335 receive pathologically verified tumour staging; palliative care was provided in these cases rather  
336 than surgery.

337

| Characteristics               | CRC, N = 40 (%)    | Healthy, N = 40 (%) | P-value |
|-------------------------------|--------------------|---------------------|---------|
| Sex, male                     | 24 (60)            | 25 (62.5)           | >0.99   |
| Age, median (range)           | 76.5 (47 – 90)     | 68.5 (46-86)        | 0.03    |
| Weight (Kg.), median (range)  | 73.5 (46 – 119)    | 76 (49-121)         | 0.58    |
| BMI, median (range)           | 24.6 (16.7 – 41.2) | 25.8 (17.6-42.9)    | 0.33    |
| Missing information (BMI)     | 2                  | 3                   |         |
| Anatomic location of sampling |                    |                     | 0.16    |
| Left-sided                    | 29 (72.5)          | 22 (55)             |         |
| Right-sided                   | 11 (27.5)          | 17 (42.5)           |         |
| Missing information           |                    | 1                   |         |
| T stage                       |                    |                     |         |
| 1                             | 4 (10)             | N/A                 | N/A     |
| 2                             | 7 (17.5)           | N/A                 | N/A     |
| 3                             | 14 (35)            | N/A                 | N/A     |

|                           |                |           |       |
|---------------------------|----------------|-----------|-------|
| 4<br>Missing information  | 5 (12.5)<br>10 | N/A       | N/A   |
| Lymph node metastases (N) | 13 (32.5)      | N/A       | N/A   |
| Distant metastases (M)    | 8 (20)         | N/A       | N/A   |
| Missing information (N/M) | 3/2            |           |       |
| pMMR/dMMR                 | 36/2           | N/A       | N/A   |
| ASA score                 |                |           |       |
| 1                         | 2 (5.0)        | 6 (15)    | <0.01 |
| 2                         | 24 (60)        | 20 (50)   |       |
| 3                         | 14 (35)        | 1 (3.7)   |       |
| Missing information       |                | 13        |       |
| Smoking                   |                |           |       |
| Yes                       | 10 (25)        | 3 (7.5)   | 0.33* |
| No                        | 12 (30)        | 14 (35)   |       |
| Previously                | 17 (42.5)      | 15 (37.5) |       |
| Missing information       | 1              | 8         |       |
| Diabetes                  |                |           |       |
| DM1                       | 1 (2.5)        | 0 (0)     | 0.41  |
| DM2                       | 10 (25)        | 6 (15)    |       |
| Missing information       |                | 6         |       |

338 **Table 1 - Characteristics of included patients with CRC and healthy subjects.**

339 ASA, American Society of Anesthesiologists. BMI, Body Mass Index (Kg/m<sup>2</sup>). DM, Diabetes  
340 mellitus. \*Current and previous smoking has been pooled for statistical analysis. Continuous data  
341 was tested with a two-sided student t-test or Mann-Whitney Test, and categorical data was tested  
342 with a chi-square test. A p-value ≤ 0.05 was considered statistically significant.

343

344 **Increased bacterial biomass was observed in CRC tissue**

345 Bacterial biomass (μm<sup>3</sup>) was quantified systematically in biopsies using panbacterial PNA-  
346 FISH. Three pairs of samples (CRC and paired normal tissue) were excluded due to non-  
347 cancerous origin (n=2) and incorrect processing (n=1). In one case, it was not possible to sample  
348 paired normal tissue. Thus, 113 mucosal biopsies from 37 patients with CRC and 40 healthy  
349 persons were examined. No differences were observed between groups after removing samples



350 (Table S1). The bacterial biomass displayed a tissue-invasive phenotype in CRC biopsies, while  
351 bacteria were generally localized along the epithelial lining of healthy colon biopsies  
352 (representative images shown in Figures 1B and 1C). Large patches of aggregated bacteria  
353 (biofilm) were frequently observed in CRC tissue, and bacterial biomass was higher in CRC  
354 tissue compared to paired normal and healthy tissue (Figure 1D). The mean bacterial biomass  
355 was 11 to 17-fold higher in CRC tissue (0.70% of the total biomass) compared to paired normal  
356 (0.06%) and healthy tissue (0.04%). There were no differences in biopsy sizes across the groups  
357 (Figure 1E). When stratifying the bacterial biomass into the respective anatomic locations of  
358 sampling (Figure 1A), a stepwise increase in mean bacterial biomass was observed from the  
359 rectum ( $3.93 \pm 0.90$  SD) over sigmoideum ( $4.32 \pm 1.01$  SD) to colon ascendens ( $4.35 \pm 0.65$  SD)  
360 and caecum ( $4.76 \pm 0.72$  SD); however, this was not significant. Similarly, no differences (mean  
361 difference =  $0.59 \pm 0.37$  SEM,  $p=0.12$ ) were observed when stratifying into left- and right-sided  
362 tumours (Figure 1F), as previously reported<sup>38</sup>. Bacterial biomass was not associated with  
363 tumour staging (T1-T4), lymph node metastasis (N), or distant metastasis (M) (Figure S2).

364

365 **The prevalence of *Fusobacterium spp.* correlated with increased bacterial biomass and**  
366 **virulence expression profile in CRC tissue**

367 Species-specific PNA-FISH was used to assess the prevalence and contribution of  
368 *Fusobacterium spp.* and *B. fragilis* to bacterial biomass in CRC. Successive separation of the  
369 probes was initially tested in spiked tissue and tumour tissue (Figure 2A). *Fusobacterium spp.*  
370 were observed in 24 out of 37 (64.9 %) tumour biopsies, 18 out of 36 (50.0 %) paired normal  
371 biopsies, and 14 out of 40 (35.0 %) healthy biopsies. *B. fragilis* was observed in 19 out of 37  
372 tumour biopsies (51.4 %), 15 out of 36 paired normal biopsies (41.7 %), and 13 out of 40 healthy

373 biopsies (32.5 %). The prevalence of *Fusobacterium spp.* was significantly higher in CRC tissue  
374 than in healthy tissue (Figure 2B). No difference in prevalence was observed between groups for  
375 *B. fragilis*. Interestingly, a higher prevalence of *B. fragilis* (Figure 2C) and *Fusobacterium spp.*  
376 (Figure 2D) was observed in right-sided tumours, suggesting anatomical preference. The  
377 prevalence of *Fusobacterium spp.* and *B. fragilis* was not associated with tumour staging (T1-  
378 T4), lymph node metastasis (N), or distant metastasis (M) (Figure S2).

379 Microscopy revealed that *Fusobacterium spp.* formed a substantial proportion of the mixed-  
380 species biofilms in CRC tissue (representative image in Figure 2E), suggesting superior adhesion  
381 or facilitated co-adhesion of other bacteria. Adhesion of *Fusobacterium spp.* to the epithelial  
382 cells or other bacteria through its virulence factors is well described<sup>39-42</sup>. A sub-group analysis  
383 revealed that samples positive with *Fusobacterium spp.* had a higher mean percentage of  
384 bacterial biomass (1.06 % vs. 0.14 %) than those without *Fusobacterium spp.* (Figure 2F).

385 Similarly, the mean bacterial biomass in samples with *B. fragilis* (Figure 2G) was higher than  
386 those without; however, we hypothesized these findings were confounded due to co-infection by  
387 *Fusobacterium spp.* (Figure 2H). Therefore, the specific bacterial biomass of *Fusobacterium spp.*  
388 and *B. fragilis* was analyzed in seven co-infected samples with high bacterial biomass.

389 *Fusobacterium spp.* was more abundant than *B. fragilis* in these samples, and a significant  
390 difference was observed in the mean percentage of bacterial biomass (Figure 2I).

391 Moreover, the expression patterns of *B. fragilis* enterotoxin (BFT) and the *F. nucleatum*  
392 virulence factors FadA, Fap2, FomA, and radD were analyzed. Only the virulence factors of *F.*  
393 *nucleatum* were enriched in CRC samples (Figure 2J), showing that no active enterotoxin-  
394 producing *B. fragilis* were present and that *Fusobacterium spp.* expressed the virulence factors  
395 necessitated for epithelial adherence and co-adherence to other bacteria.

396

397 **Bacterial biomass was associated with acute inflammation and co-localized with necrotic**  
398 **areas in CRC tissue**

399 Two blinded pathologists scored CRC biopsies to determine if bacteria influenced the TME.  
400 Inflammation scores, reflecting PMNs and lymphocyte infiltration, were given for acute and  
401 chronic inflammation<sup>24 25</sup>. Samples with high bacterial biomass had a higher degree of acute  
402 inflammation than samples with low bacterial biomass (Figure 3A). Similarly, there was a higher  
403 degree of inflammation in samples with *B. fragilis* and *Fusobacterium spp.*; however, this was  
404 not significant (Figures 3B and 3C). No inflammation was observed in healthy biopsies (data not  
405 shown). Moreover, in 18 samples (85.71 %) with high bacterial biomass (n = 21), it was  
406 observed that bacteria and necrotic tissue were co-localized (representative images shown in  
407 Figure 3D), suggesting an anatomical preference for biofilm growth or that bacteria are involved  
408 in the malignant transformation.

409

410 **Higher counts for bacteria, *F. nucleatum*, and *B. fragilis* were observed in CRC tissue**

411 RNA sequencing was performed on 118 samples to assess the bacterial activity within CRC,  
412 paired normal, and healthy tissue. Two samples were excluded: one healthy sample due to a  
413 failed library preparation and one paired normal sample because it was not possible to collect  
414 tissue. RNA-seq reads were taxonomically assigned, classified, scaled, and quantified for each  
415 sample. In all samples, the highest counts were assigned to Eukaryota (mainly human), bacteria,  
416 viruses, and archaea in the order mentioned (Figure S1). Bacterial counts were in the order of  
417 1:100 compared to human counts. Sample type described the majority of sample variation  
418 (Figure S3). Bacterial counts were higher in CRC tissue (Figure 4A) when compared to paired

419 normal ( $p < 0.003$ , Wilcoxon signed-rank test) and healthy tissue ( $p = 0.03$ , Wilcoxon rank-sum-  
420 test). The groups did not differ in alpha diversity (Figure 4B). The Fusobacteria phylum (Figure  
421 4C) showed higher counts in CRC tissue than in healthy ( $p < 0.001$ , Wilcoxon rank-sum-test) or  
422 paired normal tissue ( $p < 0.001$ , Wilcoxon signed-rank test). In general, Firmicutes and  
423 Proteobacteria were the dominant phyla across all groups (Figure 4D-4F), while an increase of  
424 Bacteroidota, Fusobacteria, and Actinobacteria was mainly observed in the CRC group (Figure  
425 4G-4I). Similar to previous findings, *F. nucleatum* and *B. fragilis* counts were higher in CRC  
426 tissue (Figure 4J) compared to healthy ( $p < 0.001$ , Wilcoxon rank-sum-test) and paired normal  
427 tissue ( $p < 0.001$ , Wilcoxon signed-rank test). Nine and seven samples deviated from the normal  
428 count distribution assigned to *F. nucleatum* and *B. fragilis*, respectively (Figure S1). In the nine  
429 samples, counts assigned to *F. nucleatum* comprised approximately 79% of the total counts  
430 assigned to the Fusobacteria phylum. Other *Fusobacterium spp.* were present in CRC samples;  
431 however, *F. nucleatum* was most abundant (Figure 2K). These results suggest that increased  
432 findings of *Fusobacterium spp.* in the samples subjected to microscopy probably were due to the  
433 presence of *F. nucleatum*.

434

### 435 **Higher bacterial activity in CRC tissue affects host transcription and immune phenotype**

436 Six CRC samples containing elevated levels of bacterial RNA were identified in our cohort  
437 (Figure S1C). To assess the effect of increased bacterial activity on the TME, differential gene  
438 expression and functional enrichment analyses were performed between the CRC samples  
439 containing high ( $n = 6$ ) and low ( $n = 34$ ) bacterial RNA. This analysis identified 332 significantly  
440 differentially expressed genes due to bacterial activity in CRC, where 252 showed increased  
441 expression with increased bacterial activity (Figure 5A). These included increased expression of

442 several proinflammatory cytokines (*CXCL6*, *CXCL8*, *CXCL9*, *IL1B*, *IL6*, *CCL3*, and *CCL7*),  
443 defensins (*DEFA1*, *DEFA3*, *DEFA4*, *DEFB125*, *DEFB129*, and *DEFB131*), matrix-  
444 metalloproteases (*MMP1*, *MMP 12*, and *MMP13*) and other immunomodulatory factors and  
445 receptors (*S100A8*, *MEFV*, *CD86*, *CSF3*, *FPRI*, *PTGS2*, and *TLR*). These genes represented  
446 significant enrichment of IL-10 signalling, defensin, chemokine, and other pathways (Figure  
447 5B). Further, metabolic pathways involving UDP-glucuronosyltransferases (*UGT1A1*,  
448 *UGT1A10*, *UGT1A4*, *UGT1A7*, *UGT1A8*, *UGT1A9*, *UGT2B15*, and *UGT2B17*), alcohol  
449 dehydrogenases (*ADH1B* and *ADH1C*), and cytochrome P450 genes (*CYP2B6*, *CYP2C18*,  
450 *CYP2C19*, *CYP2B6*, *CYP2C18*, *CYP2C19*, and *CYP4F12*) showed significantly increased  
451 expression in samples with low bacterial activity. Interestingly, many of these significantly  
452 enriched pathways in CRC samples with low bacterial activity (Figure 5B) overlapped with  
453 significantly enriched pathways in healthy samples compared with CRC samples (Figure S3).  
454 We then investigated whether an increased total bacterial or species-specific activity of *F.*  
455 *nucleatum* and *B. fragilis* affected the TME immune phenotype in CRC tissue. This analysis  
456 integrated several existing cell deconvolution and immune scoring systems to develop a more  
457 robust estimate and was grouped by whether the output was a fraction (Figure 5C) or a  
458 normalized score (Figure 5D). This analysis included 115 samples (3 samples were identified as  
459 outliers and removed from the dataset), and 26,920 genes were used. Four clusters were  
460 identified separating CRC and healthy samples (paired normal and healthy tissue) with high and  
461 low immune scores (Figure 5E). The overall bacterial and species-specific activity showed  
462 associations with clusters but not with specific immune-cell subtype abundance herein.  
463 However, when differentiating between individual immune cell subtypes across sample types  
464 (CRC, paired normal, and healthy tissue), bacterial counts affected the infiltration of

465 macrophage/monocyte, myeloid dendritic cells, regulatory T-cells, tumour purity fraction, and  
 466 tumour purity score (Table 2). *F. nucleatum* did not correlate with the infiltration of any immune  
 467 cells across sample type, while *B. fragilis* correlated with the infiltration of neutrophils and the  
 468 tumour purity fraction score (Table 2). The analysis was also conducted excluding paired normal  
 469 samples, as dysbiosis has been suggested to occur in the whole colon<sup>43</sup>. Similar hierarchical  
 470 sample clustering was observed (Figures S5A and S5B). Only species-specific activity was  
 471 associated with clusters but not specific immune-cell subtype abundance. When assessing the  
 472 influence on sample types, *F. nucleatum* correlated with the infiltration of effector memory  
 473 CD4+ T-cells, while *B. fragilis* did not correlate with the infiltration of any immune cell  
 474 subtypes. Of particular interest, the list of immune cell subtypes was extended for total bacterial  
 475 counts (Table 2), including the immune and microenvironment scores. An overview of all the  
 476 immune cell subtypes and methods used can be found in Tables S2-S7.

477

478 **Table 2 - Bacterial groups impacting infiltration of specific immune cells in CRC tissue.**

**Paired normal and healthy tissue samples were used as controls.**

| <b>Specific counts</b> | <b>Affected immune cell group</b>   | <b>Strength of association</b> | <b>Methods finding an effect</b> |
|------------------------|-------------------------------------|--------------------------------|----------------------------------|
| Bacteria               | Macrophage/Monocyte                 | p < 0.01                       | 1 out of 1                       |
| Bacteria               | Myeloid dendritic cells (activated) | p < 0.05                       | 1 out of 1                       |
| Bacteria               | Regulatory T-cells                  | p < 0.001                      | 1 out of 2                       |
| Bacteria               | Tumour purity fraction              | p < 0.001                      | 1 out of 1                       |
| Bacteria               | Tumour purity score                 | p < 0.05                       | 1 out of 1                       |
| <i>B. fragilis</i>     | Neutrophils                         | p < 0.05                       | 1 out of 4                       |
| <i>B. fragilis</i>     | Tumour purity fraction              | p < 0.05                       | 1 out of 1                       |

**Healthy tissue samples were used as controls.**

| <b>Specific counts</b> | <b>Affected immune cell group</b>   | <b>Strength of association</b> | <b>Methods finding an effect</b> |
|------------------------|-------------------------------------|--------------------------------|----------------------------------|
| Bacteria               | Eosinophils                         | $p < 0.05$                     | 1 out of 2                       |
| Bacteria               | Hematopoietic stem cell             | $p < 0.01$                     | 1 out of 1                       |
| Bacteria               | Immune score                        | $p < 0.05$ and $p < 0.01$      | 2 out of 3                       |
| Bacteria               | Macrophage M2                       | $p < 0.05$ and $p < 0.05$      | 2 out of 2                       |
| Bacteria               | Macrophage/Monocyte                 | $p < 0.01$                     | 1 out of 1                       |
| Bacteria               | Microenvironment score              | $p < 0.05$                     | 1 out of 1                       |
| Bacteria               | Monocyte                            | $p < 0.05$ and $p < 0.01$      | 2 out of 3                       |
| Bacteria               | Myeloid dendritic cells (activated) | $p < 0.001$                    | 1 out of 1                       |
| Bacteria               | Regulatory T-cells                  | $p < 0.001$                    | 1 out of 2                       |
| Bacteria               | Tumour purity fraction              | $p < 0.0001$                   | 1 out of 1                       |
| Bacteria               | Tumour purity score                 | $p < 0.01$                     | 1 out of 1                       |
| <i>F. nucleatum</i>    | T cell CD4+ effector memory         | $p < 0.05$                     | 1 out of 1                       |

479

## 480 **DISCUSSION**

### 481 **Bio-geography and bacterial biomass in CRC samples**

482 A tissue-invasive phenotype was observed in tumour biopsies with significant enrichment of  
483 bacterial biomass compared to paired normal and healthy tissues. These results are in accordance  
484 with previous findings, where approximately 50% of CRC samples and 13% of healthy samples  
485 harboured bacterial biofilms, with a higher density of bacteria in CRC samples<sup>38</sup>. In addition,  
486 when stratifying data into anatomic compartments of sampling, right-sided tumours from three  
487 different cohorts have shown invasive biofilms in 93 % of the cases, whereas it was observed in  
488 27 % of cases for left-sided tumours<sup>44</sup>. These findings support the findings in this study, where a  
489 trend towards higher bacterial biomass was observed in right-sided tumours. In agreement with  
490 previous studies, bacterial biomass did not correlate with tumour stage, lymph node metastasis,

491 or distant metastasis (Figure S2)<sup>38 44</sup>. Interestingly, there was a correlation between high  
492 bacterial biomass and the degree of infiltrating PMNs in CRC samples, meaning biofilms can  
493 alter the TME and provoke an inflammatory response. *F. nucleatum* has previously been  
494 observed in ulcerated regions<sup>45</sup>, aligning with our results, where bacterial biomass co-localized  
495 with necrotic tissue, further implicating biofilms in the inflammatory response.

496

### 497 **Core pathogens in CRC tissue**

498 Consistent with the microscopic findings, increased bacterial richness or transcriptional activity  
499 was observed in CRC tissue compared to healthy and paired normal tissue. Mucosal biopsies  
500 were enriched with Proteobacteria and Firmicutes across all groups, with the highest counts  
501 assigned to CRC tissue. In addition, there was an increase in counts assigned to Bacteroidota,  
502 Fusobacteria, and Actinobacteria in the CRC group. A recent study by Zhao et al. described the  
503 consensus mucosal microbiome from 924 tumours, including eight RNA datasets across  
504 different geographical locations, and found the same phyla elevated in CRC tissue with no  
505 difference in alpha diversity, similar to our findings<sup>46</sup>.

506 *F. nucleatum* has been well studied over the last couple of years, and multiple studies have found  
507 an enrichment of this bacterium in CRC tissue<sup>44 47 48</sup>. In our study, *F. nucleatum* was  
508 significantly enriched in CRC tissue and was the dominant species in the Fusobacteria phylum.  
509 Interestingly, *Fusobacterium spp.* was more prevalent in right-sided tumours. A previous study  
510 could not find a correlation between *F. nucleatum* and right-sided tumours<sup>44</sup>; however, they  
511 employed sequencing techniques specific to *F. nucleatum*, whereas a probe targetting  
512 *Fusobacterium spp.* was used in this study, which could explain the difference. In support of this  
513 notion, a study by Tahara et al. found a correlation between the enrichment of *Fusobacterium*



514 *spp.* and subsets of colorectal cancers known to dominate in right-sided tumours<sup>49</sup>. Of particular  
515 interest, we found that *Fusobacterium spp.* was associated with higher bacterial biomass,  
516 suggesting superior adhesion of *Fusobacterium spp.* to the host tissue or that *Fusobacterium spp.*  
517 facilitated the co-adhesion of other bacteria, as reported for *F. nucleatum* in periodontal diseases  
518<sup>39 50</sup>. *F. nucleatum* has tissue-adhesive and co-aggregating properties qua its virulence factors  
519 FadA Fap2, RadD, and FomA<sup>39-42</sup>. Accordingly, FadA, Fap2, RadD, and FomA expression were  
520 detected in CRC samples with high *F. nucleatum* counts. To our knowledge, this is the first  
521 study to show that *Fusobacterium spp.* are associated with increased bacterial biomass in CRC.  
522 A recent study employing laser-microdissection 16S rRNA gene sequencing on tissue samples  
523 also found enrichment of *B. fragilis* in right-sided tumours<sup>51</sup>. Similarly, we found that *B. fragilis*  
524 was enriched on the right side of the colon. *B. fragilis* displays high strain diversity in the human  
525 gut and can be divided into toxigenic (BFT-producing) or non-toxigenic strains, both implicated  
526 in CRC tumorigenesis<sup>52</sup>. We could not detect the expression of BFT in our study, suggesting  
527 that no active toxin-producing *B. fragilis* were present. *B. fragilis* toxins are more common in  
528 right-sided tumours<sup>53</sup>, and the inclusion of a few right-sided tumour biopsies in our study might  
529 influence these findings. In contrast to microscopy findings, a higher enrichment of *B. fragilis*  
530 was observed in CRC samples compared to healthy and paired normal tissue, emphasizing the  
531 importance of using complementary methods to characterize the mucosa-associated microbiota.  
532

### 533 **Bacterial activity and host-associated transcriptional and immunologic responses**

534 Samples submitted to RNA sequencing varied in terms of bacterial activity and the expression  
535 profile of genes. Samples with high bacterial activity exhibited a pro-inflammatory signature  
536 with increased expression of genes coding for pro-inflammatory cytokines, defensins, matrix-

537 metalloproteases, and other immunomodulatory factors. These findings contrasted with the  
538 expression profile in samples with a low bacterial activity where the enriched pathways  
539 overlapped with significantly enriched pathways in healthy samples. These findings highlight  
540 that increased bacterial activity negatively impacts the local TME in terms of an increased  
541 inflammatory response, which can fuel or sustain a pro-tumourigenic environment.  
542 In line with this, total bacterial counts affected several immune cell subpopulations in CRC  
543 tissue, including the overall immune and microenvironment scores. The species-specific  
544 association was modest and included associations between *B. fragilis* and neutrophil infiltration  
545 and between *F. nucleatum* and effector memory CD4+ T-cell infiltration. Previous studies have  
546 evaluated the effect of *F. nucleatum* on CD4+ T-cell activity, with conflicting findings<sup>11 12 54</sup>;  
547 however, to our knowledge, this is the first time that *B. fragilis* has been associated with the  
548 infiltration of neutrophils. These results indicate that the species-specific contribution to immune  
549 cell infiltration only constitutes a part of the immunologic response and emphasize the  
550 importance of widening the bacterial scope when investigating the bacterial role in CRC  
551 carcinogenesis.

552

## 553 **CONCLUSION**

554 CRC core pathogens such as *F. nucleatum* and *B. fragilis* are highly prevalent in CRC tissue,  
555 specifically right-sided tumours. *F. nucleatum* plays a role in the build-up of mixed-species  
556 biofilms, possibly due to the expression of tissue-adhesive and co-aggregating virulence factors,  
557 resulting in an increased accumulation of bacterial biomass and higher inflammatory response.  
558 These findings suggest a reduction in the bacterial biomass as a potential target to reduce  
559 inflammation-driven CRC carcinogenesis; however, there is a lack of clinical studies in this area,

560 and future studies should explore the clinical implications of reducing bacterial biomass or  
561 species-specific antimicrobial targeting of *Fusobacterium spp.* While *F. nucleatum* and *B.*  
562 *fragilis* were enriched in CRC tissue, their effect on the TME and infiltration of immune cells  
563 was modest. In contrast, the collective presence of bacteria seemed more relevant in altering the  
564 immune phenotype and regulating genes and critical pathways. These observations confirm the  
565 narrative of the involvement of *F. nucleatum* and *B. fragilis* in CRC carcinogenesis while  
566 highlighting the importance of also widening the bacterial scope beyond CRC core pathogens  
567 when deciphering the role of bacteria in CRC carcinogenesis.

568

## 569 **ACKNOWLEDGEMENTS**

570 We want to thank Veronica Drejer for her sublime help with RNA purification and preparation  
571 of samples for RNA sequencing. We would also like to thank Britt Capellen from the Center of  
572 Surgical Science for the initial sample preparation prior to RNA purification. The illustration of  
573 the sampling area in Figure 1 was created with Biorender.com.

574

## 575 **AUTHOR CONTRIBUTIONS**

576 Conceptualization, L.K., I.G., and T.B.; methodology, L.K., B.G.F, I.G., and T.B.; investigation,  
577 L.K., B.G.F., M.R.J., and A.G.G.; data curation, L.K., B.G.F., H.Z., T.B.T., and K.H-R.; data  
578 analysis, L.K. B.G.F., T.B.T., and H.Z.; generation of figures, L.K. B.G.F., T.B.T., and H.Z.;  
579 writing – original draft, L.K.; writing – review & editing, All authors.; supervision, H.R, I.G.  
580 and T.B.; project administration, L.K.; funding acquisition, I.G., and T.B.

581

## 582 **DECLARATION OF INTERESTS**

583 The authors declare no conflict of interest.

584

## 585 **FUNDING**

586 This work was supported by a grant from the Novo Nordisk Foundation (Tandem program  
587 #NNF19OC0054390 to T.B.). Also, we would like to acknowledge Greater Copenhagen Health  
588 Science Partners (GCHSP) for their financial support.

589

## 590 **REFERENCES**

- 591 1. Zhao L, Grimes SM, Greer SU, et al. Characterization of the consensus mucosal microbiome of  
592 colorectal cancer. *NAR Cancer* 2021;3(4) doi: 10.1093/narcan/zcab049
- 593 2. Yu J, Feng Q, Wong SH, et al. Metagenomic analysis of faecal microbiome as a tool towards targeted  
594 non-invasive biomarkers for colorectal cancer. *Gut* 2017;66(1):70-78. doi: 10.1136/gutjnl-2015-  
595 309800 [published Online First: 2015/09/27]
- 596 3. Yachida S, Mizutani S, Shiroma H, et al. Metagenomic and metabolomic analyses reveal distinct stage-  
597 specific phenotypes of the gut microbiota in colorectal cancer. *Nature medicine* 2019;25(6):968-  
598 76. doi: 10.1038/s41591-019-0458-7 [published Online First: 2019/06/07]
- 599 4. Amitay EL, Krilaviciute A, Brenner H. Systematic review: Gut microbiota in fecal samples and detection  
600 of colorectal neoplasms. *Gut Microbes* 2018;9(4):293-307. doi:  
601 10.1080/19490976.2018.1445957 [published Online First: 2018/03/16]
- 602 5. Janney A, Powrie F, Mann EH. Host-microbiota maladaptation in colorectal cancer. *Nature*  
603 2020;585(7826):509-17. doi: 10.1038/s41586-020-2729-3 [published Online First: 2020/09/25]
- 604 6. Coussens LM, Werb Z. Inflammation and cancer. *Nature* 2002;420(6917):860-7. doi:  
605 10.1038/nature01322 [published Online First: 2002/12/20]
- 606 7. Tjalsma H, Boleij A, Marchesi JR, et al. A bacterial driver-passenger model for colorectal cancer:  
607 beyond the usual suspects. *Nature Reviews Microbiology* 2012;10(8):575-82. doi:  
608 10.1038/nrmicro2819
- 609 8. Bennedsen ALB, Furbo S, Bjarnsholt T, et al. The gut microbiota can orchestrate the signaling  
610 pathways in colorectal cancer. *APMIS : acta pathologica, microbiologica, et immunologica*  
611 *Scandinavica* 2022;130(3):121-39. doi: 10.1111/apm.13206 [published Online First: 2022/01/11]
- 612 9. Geis AL, Fan H, Wu X, et al. Regulatory T-cell Response to Enterotoxigenic *Bacteroides fragilis*  
613 Colonization Triggers IL17-Dependent Colon Carcinogenesis. *Cancer Discov* 2015;5(10):1098-  
614 109. doi: 10.1158/2159-8290.Cd-15-0447 [published Online First: 2015/07/24]
- 615 10. Wu J, Li Q, Fu X. *Fusobacterium nucleatum* Contributes to the Carcinogenesis of Colorectal Cancer by  
616 Inducing Inflammation and Suppressing Host Immunity. *Translational oncology* 2019;12(6):846-  
617 51. doi: 10.1016/j.tranon.2019.03.003 [published Online First: 2019/04/16]
- 618 11. Kostic AD, Chun E, Robertson L, et al. *Fusobacterium nucleatum* potentiates intestinal tumorigenesis  
619 and modulates the tumor-immune microenvironment. *Cell Host Microbe* 2013;14(2):207-15.  
620 doi: 10.1016/j.chom.2013.07.007 [published Online First: 2013/08/21]

- 621 12. Gur C, Maalouf N, Shhadeh A, et al. Fusobacterium nucleatum supresses anti-tumor immunity by  
622 activating CEACAM1. *Oncoimmunology* 2019;8(6):e1581531. doi:  
623 10.1080/2162402x.2019.1581531 [published Online First: 2019/05/10]
- 624 13. Xue Y, Xiao H, Guo S, et al. Indoleamine 2,3-dioxygenase expression regulates the survival and  
625 proliferation of Fusobacterium nucleatum in THP-1-derived macrophages. *Cell Death Dis*  
626 2018;9(3):355. doi: 10.1038/s41419-018-0389-0 [published Online First: 2018/03/04]
- 627 14. Brennan CA, Garrett WS. Gut Microbiota, Inflammation, and Colorectal Cancer. *Annu Rev Microbiol*  
628 2016;70:395-411. doi: 10.1146/annurev-micro-102215-095513 [published Online First:  
629 2016/09/09]
- 630 15. Fritz BG, Kirkegaard JB, Nielsen CH, et al. Transcriptomic fingerprint of bacterial infection in lower  
631 extremity ulcers. *APMIS : acta pathologica, microbiologica, et immunologica Scandinavica*  
632 2022;130(8):524-34. doi: 10.1111/apm.13234 [published Online First: 2022/05/15]
- 633 16. Cornforth DM, Dees JL, Ibberson CB, et al. Pseudomonas aeruginosa transcriptome during human  
634 infection. *Proc Natl Acad Sci U S A* 2018;115(22):E5125-e34. doi: 10.1073/pnas.1717525115  
635 [published Online First: 2018/05/16]
- 636 17. Saus E, Iraola-Guzmán S, Willis JR, et al. Microbiome and colorectal cancer: Roles in carcinogenesis  
637 and clinical potential. *Molecular aspects of medicine* 2019;69:93-106. doi:  
638 10.1016/j.mam.2019.05.001 [published Online First: 2019/05/15]
- 639 18. Aitmanaitė L, Širmonaitis K, Russo G. Microbiomes, Their Function, and Cancer: How  
640 Metatranscriptomics Can Close the Knowledge Gap. *International journal of molecular sciences*  
641 2023;24(18) doi: 10.3390/ijms241813786 [published Online First: 2023/09/28]
- 642 19. Rigottier-Gois L, Rochet V, Garrec N, et al. Enumeration of Bacteroides species in human faeces by  
643 fluorescent in situ hybridisation combined with flow cytometry using 16S rRNA probes.  
644 *Systematic and applied microbiology* 2003;26(1):110-8. doi: 10.1078/072320203322337399  
645 [published Online First: 2003/05/16]
- 646 20. Valm AM, Welch JLM, Rieken CW, et al. Systems-level analysis of microbial community organization  
647 through combinatorial labeling and spectral imaging. *Proceedings of the National Academy of*  
648 *Sciences* 2011;108(10):4152-57. doi: 10.1073/pnas.1101134108
- 649 21. Bay L, Kragh KN, Eickhardt SR, et al. Bacterial Aggregates Establish at the Edges of Acute Epidermal  
650 Wounds. *Adv Wound Care (New Rochelle)* 2018;7(4):105-13. doi: 10.1089/wound.2017.0770  
651 [published Online First: 2018/04/21]
- 652 22. Stender H, Mollerup TA, Lund K, et al. Direct detection and identification of Mycobacterium  
653 tuberculosis in smear-positive sputum samples by fluorescence in situ hybridization (FISH) using  
654 peptide nucleic acid (PNA) probes. *The international journal of tuberculosis and lung disease :*  
655 *the official journal of the International Union against Tuberculosis and Lung Disease*  
656 1999;3(9):830-7. [published Online First: 1999/09/17]
- 657 23. Kragh KN, Alhede M, Kvich L, et al. Into the well-A close look at the complex structures of a  
658 microtiter biofilm and the crystal violet assay. *Biofilm* 2019;1:100006. doi:  
659 10.1016/j.bioflm.2019.100006 [published Online First: 2019/09/12]
- 660 24. Klopffleisch R. Multiparametric and semiquantitative scoring systems for the evaluation of mouse  
661 model histopathology--a systematic review. *BMC Vet Res* 2013;9:123. doi: 10.1186/1746-6148-  
662 9-123 [published Online First: 2013/06/27]
- 663 25. Kolpen M, Kragh KN, Enciso JB, et al. Bacterial biofilms predominate in both acute and chronic  
664 human lung infections. *Thorax* 2022;77(10):1015-22. doi: 10.1136/thoraxjnl-2021-217576  
665 [published Online First: 2022/01/13]
- 666 26. Martin M. Cutadapt removes adapter sequences from high-throughput sequencing reads. *2011*  
667 2011;17(1):3. doi: 10.14806/ej.17.1.200 [published Online First: 2011-08-02]

- 668 27. Kopylova E, Noé L, Touzet H. SortMeRNA: fast and accurate filtering of ribosomal RNAs in  
669 metatranscriptomic data. *Bioinformatics* 2012;28(24):3211-7. doi:  
670 10.1093/bioinformatics/bts611 [published Online First: 2012/10/17]
- 671 28. Li H. Aligning sequence reads, clone sequences and assembly contigs with BWA-MEM. *arXiv:*  
672 *Genomics* 2013
- 673 29. Liao Y, Smyth GK, Shi W. The Subread aligner: fast, accurate and scalable read mapping by seed-and-  
674 vote. *Nucleic Acids Res* 2013;41(10):e108. doi: 10.1093/nar/gkt214 [published Online First:  
675 2013/04/06]
- 676 30. Wood DE, Lu J, Langmead B. Improved metagenomic analysis with Kraken 2. *Genome Biology*  
677 2019;20(1):257. doi: 10.1186/s13059-019-1891-0
- 678 31. Lu J, Breitwieser F.P., Thielen P., et al. Bracken: estimating species abundance in metagenomics  
679 data. *PeerJ Computer Science* 2017;3:e104 doi: <https://doi.org/10.7717/peerj-cs.104>
- 680 32. Durinck S, Moreau Y, Kasprzyk A, et al. BioMart and Bioconductor: a powerful link between  
681 biological databases and microarray data analysis. *Bioinformatics* 2005;21(16):3439-40. doi:  
682 10.1093/bioinformatics/bti525 [published Online First: 2005/08/06]
- 683 33. Priya S, Burns MB, Ward T, et al. Identification of shared and disease-specific host gene–microbiome  
684 associations across human diseases using multi-omic integration. *Nature Microbiology*  
685 2022;7(6):780-95. doi: 10.1038/s41564-022-01121-z
- 686 34. Nederlof I, De Bortoli D, Bareche Y, et al. Comprehensive evaluation of methods to assess overall  
687 and cell-specific immune infiltrates in breast cancer. *Breast Cancer Res* 2019;21(1):151. doi:  
688 10.1186/s13058-019-1239-4 [published Online First: 2019/12/28]
- 689 35. Finotello F, Trajanoski Z. Quantifying tumor-infiltrating immune cells from transcriptomics data.  
690 *Cancer immunology, immunotherapy : CII* 2018;67(7):1031-40. doi: 10.1007/s00262-018-2150-z  
691 [published Online First: 2018/03/16]
- 692 36. Sturm G, Finotello F, List M. Immunedeconv: An R Package for Unified Access to Computational  
693 Methods for Estimating Immune Cell Fractions from Bulk RNA-Sequencing Data. *Methods in*  
694 *molecular biology (Clifton, NJ)* 2020;2120:223-32. doi: 10.1007/978-1-0716-0327-7\_16  
695 [published Online First: 2020/03/04]
- 696 37. Ritchie ME, Phipson B, Wu D, et al. limma powers differential expression analyses for RNA-  
697 sequencing and microarray studies. *Nucleic Acids Research* 2015;43(7):e47-e47. doi:  
698 10.1093/nar/gkv007
- 699 38. Dejea CM, Wick EC, Hechenbleikner EM, et al. Microbiota organization is a distinct feature of  
700 proximal colorectal cancers. *Proc Natl Acad Sci U S A* 2014;111(51):18321-6. doi:  
701 10.1073/pnas.1406199111 [published Online First: 2014/12/10]
- 702 39. Lima BP, Shi W, Lux R. Identification and characterization of a novel *Fusobacterium nucleatum*  
703 adhesin involved in physical interaction and biofilm formation with *Streptococcus gordonii*.  
704 *MicrobiologyOpen* 2017;6(3):e00444. doi: <https://doi.org/10.1002/mbo3.444>
- 705 40. Copenhagen-Glazer S, Sol A, Abed J, et al. Fap2 of *Fusobacterium nucleatum* is a galactose-  
706 inhibitable adhesin involved in coaggregation, cell adhesion, and preterm birth. *Infection and*  
707 *immunity* 2015;83(3):1104-13. doi: 10.1128/iai.02838-14 [published Online First: 2015/01/07]
- 708 41. Kaplan CW, Lux R, Haake SK, et al. The *Fusobacterium nucleatum* outer membrane protein RadD is  
709 an arginine-inhibitable adhesin required for inter-species adherence and the structured  
710 architecture of multispecies biofilm. *Mol Microbiol* 2009;71(1):35-47. doi: 10.1111/j.1365-  
711 2958.2008.06503.x [published Online First: 2008/11/15]
- 712 42. Liu PF, Shi W, Zhu W, et al. Vaccination targeting surface FomA of *Fusobacterium nucleatum* against  
713 bacterial co-aggregation: Implication for treatment of periodontal infection and halitosis.

- 714 *Vaccine* 2010;28(19):3496-505. doi: 10.1016/j.vaccine.2010.02.047 [published Online First:  
715 2010/03/02]
- 716 43. Kinross J, Mirnezami R, Alexander J, et al. A prospective analysis of mucosal microbiome-  
717 metabonome interactions in colorectal cancer using a combined MAS 1HNMR and  
718 metataxonomic strategy. *Scientific Reports* 2017;7(1):8979. doi: 10.1038/s41598-017-08150-3  
719 44. Drewes JL, White JR, Dejea CM, et al. High-resolution bacterial 16S rRNA gene profile meta-analysis  
720 and biofilm status reveal common colorectal cancer consortia. *NPJ biofilms and microbiomes*  
721 2017;3:34. doi: 10.1038/s41522-017-0040-3 [published Online First: 2017/12/08]
- 722 45. Bullman S, Pedamallu CS, Sicinska E, et al. Analysis of *Fusobacterium* persistence and antibiotic  
723 response in colorectal cancer. *Science* 2017;358(6369):1443-48. doi: 10.1126/science.aal5240  
724 [published Online First: 2017/11/25]
- 725 46. Zhao L, Grimes SM, Greer SU, et al. Characterization of the consensus mucosal microbiome of  
726 colorectal cancer. *NAR Cancer* 2021;3(4):zcab049. doi: 10.1093/narcan/zcab049 [published  
727 Online First: 2022/01/07]
- 728 47. Nakatsu G, Li X, Zhou H, et al. Gut mucosal microbiome across stages of colorectal carcinogenesis.  
729 *Nature Communications* 2015;6(1):8727. doi: 10.1038/ncomms9727
- 730 48. Purcell RV, Visnovska M, Biggs PJ, et al. Distinct gut microbiome patterns associate with consensus  
731 molecular subtypes of colorectal cancer. *Sci Rep* 2017;7(1):11590. doi: 10.1038/s41598-017-  
732 11237-6 [published Online First: 2017/09/16]
- 733 49. Tahara T, Yamamoto E, Suzuki H, et al. *Fusobacterium* in colonic flora and molecular features of  
734 colorectal carcinoma. *Cancer Res* 2014;74(5):1311-8. doi: 10.1158/0008-5472.can-13-1865  
735 [published Online First: 2014/01/05]
- 736 50. Chen Y, Huang Z, Tang Z, et al. More Than Just a Periodontal Pathogen -the Research Progress on  
737 *Fusobacterium nucleatum*. *Front Cell Infect Microbiol* 2022;12:815318. doi:  
738 10.3389/fcimb.2022.815318 [published Online First: 2022/02/22]
- 739 51. Saffarian A, Mulet C, Regnault B, et al. Crypt- and Mucosa-Associated Core Microbiotas in Humans  
740 and Their Alteration in Colon Cancer Patients. *mBio* 2019;10(4) doi: 10.1128/mBio.01315-19  
741 [published Online First: 2019/07/18]
- 742 52. Clay SL, Fonseca-Pereira D, Garrett WS. Colorectal cancer: the facts in the case of the microbiota.  
743 *The Journal of clinical investigation* 2022;132(4) doi: 10.1172/jci155101 [published Online First:  
744 2022/02/16]
- 745 53. Boleij A, Hechenbleikner EM, Goodwin AC, et al. The *Bacteroides fragilis* toxin gene is prevalent in  
746 the colon mucosa of colorectal cancer patients. *Clin Infect Dis* 2015;60(2):208-15. doi:  
747 10.1093/cid/ciu787 [published Online First: 2014/10/12]
- 748 54. Brennan CA, Clay SL, Lavoie SL, et al. *Fusobacterium nucleatum* drives a pro-inflammatory intestinal  
749 microenvironment through metabolite receptor-dependent modulation of IL-17 expression. *Gut*  
750 *Microbes* 2021;13(1):1987780. doi: 10.1080/19490976.2021.1987780 [published Online First:  
751 2021/11/17]

752

753

## 754 **FIGURE LEGENDS (MAIN FIGURES)**

755

756 **Figure 1 – Assessment of bacterial biomass in biopsies collected from patients with and**  
757 **without CRC. A)** Diagram showing the anatomical sampling of CRC biopsies. **B)** Cross-  
758 sections of tumour biopsies (top panel) and healthy tissue biopsies (bottom panel) showing the  
759 distribution of bacterial biomass. Yellow arrows indicate the area with bacterial biomass and a  
760 mask was created to overlay areas with bacteria with the Imaris software through thresholding of  
761 fluorescence intensity. Tissue was visible via autofluorescence. Scale bars are shown in the  
762 lower-left corner of all images. **C)** Morphological evidence of bacteria in the cross-section of a  
763 tumour biopsy from the top-panel (image C) with encircled areas in A and B representing the  
764 magnification in B and C, respectively. **D)** Logarithmic (Log) transformed bacterial biomass  
765 measured in cubic micrometers ( $\mu\text{m}^3$ ) from collected biopsies. **E)** Total tissue biomass (bacteria  
766 and tissue) measured in  $\mu\text{m}^3$  from collected biopsies. **F)** Log-transformed bacterial biomass on  
767 the left- and right-sided tumour biopsies measured in  $\mu\text{m}^3$ . Statistical comparison was carried out  
768 with paired and unpaired t-tests (**D**), paired t-test and Mann-Whitney test (**E**), and unpaired t-test  
769 (**F**). Bars represent standard deviation (SD). A p-value  $\leq 0.05$  was considered statistically  
770 significant.

771

772 **Figure 2 – Prevalence of *Fusobacterium spp.* and *B. fragilis* in CRC, paired normal, and**  
773 **healthy tissue. A)** Representative images showing the qualitative separation of FUS714  
774 (*Fusobacterium spp.*) from Bfrag-998 (*B. fragilis*) in spiked tissue (top panel) and tumour tissue  
775 (bottom panel). **B)** Prevalence of *Fusobacterium spp.* in healthy tissue and cancer tissue. **C+D)**



776 Prevalence of *B. fragilis* (C) and *Fusobacterium spp.* (D) in left- and right-sided tumours. **E)**  
777 Representative images showing mixed-species biofilms with *B. fragilis* (red), *Fusobacterium*  
778 *spp.* (green), other bacteria (purple), and host cells (blue). Image A is an overview image, and  
779 the white bracketed box shows the enlarged area in image B. **F+G)** Correlation between the  
780 prevalence of *Fusobacterium spp.* (B) and *B. fragilis* (C) and logarithmic (Log) transformed  
781 bacterial biomass in CRC tissue measured in cubic micrometers ( $\mu\text{m}^3$ ). **H)** Percentage of CRC  
782 samples positive with either *Fusobacterium spp.*, *B. fragilis*, co-infected or negative. **I)** The  
783 percentage of bacterial biomass for *B. fragilis* and *Fusobacterium spp.* on a subset of co-infected  
784 samples (n=7) with high bacterial biomass. **J)** Scaled counts assigned to the *B. fragilis* toxin  
785 (BFT) and *F. nucleatum* virulence factors FadA, Fap2, FomA, and RadD. Scale bars are shown  
786 in the lower-left corner of all images (A+E). Statistical comparison was carried out with Fisher's  
787 exact tests (**B+C+D**), unpaired t-tests (**F+G**), and Mann-Whitney tests (**I**). Bars represent  
788 standard deviation (SD). A p-value  $\leq 0.05$  was considered statistically significant.

789

790 **Figure 3 – Histopathological evaluation of the bacterial influence on the TME. A)**

791 Inflammation score for CRC samples with high and low bacterial biomass, divided into acute  
792 inflammation and chronic inflammation. **B+C)** Inflammation score for CRC samples with (+)  
793 and without (-) *B. fragilis* (B) and *Fusobacterium spp.* (C), divided into acute and chronic  
794 inflammation. **D)** Representative images showing the co-localization of bacterial biomass and  
795 necrotic tissue on cross-sections of tumour biopsies. The red encircled area indicates the area  
796 with necrosis, and the yellow arrows indicate the area with bacterial biomass. All biomass  
797 measurements were performed with the Imaris software through thresholding of fluorescence  
798 intensity. Tissue was visible via autofluorescence. Scale bars are shown in the lower-left corner

799 of all images. Statistical comparison was carried out with Mann-Whitney tests (A+B+C). Bars  
800 represent standard deviation (SD). A p-value  $\leq 0.05$  was considered statistically significant.

801

802 **Figure 4 – Characterisation of bacterial richness and diversity in CRC, paired normal, and**

803 **healthy tissue. A)** Scaled counts assigned to bacteria in CRC, healthy, and paired normal tissue.

804 **B)** The alpha diversity in CRC, healthy, and paired normal tissue was compared with the

805 Shannon index. **C)** Scaled counts assigned to Fusobacteria in CRC, healthy, and paired normal

806 tissue. **D+E+F)** Scaled counts were assigned to the seven most dominant phyla for each sample

807 in paired normal (D), healthy (E), and CRC tissue (F), respectively. **G+H+I)** Scaled counts were

808 assigned to the ten most dominant phyla across all samples in paired normal (G), healthy (H),

809 and CRC tissue (I), respectively. **J)** Relative abundance of scaled counts assigned to *B. fragilis*

810 and *F. nucleatum* in CRC, paired normal, and healthy tissue. **K)** Relative abundance of scaled

811 counts assigned to *Fusobacterium spp.* in CRC tissue. Statistical comparison was carried out

812 with Wilcoxon signed-rank test and Wilcoxon rank-sum-test (**A+C+J**), paired and unpaired t-

813 tests (**B**), and Mann-Whitney tests (**I+J+K**). Bars represent standard deviation (SD). A p-value  $\leq$

814 0.05 was considered statistically significant.

815

816 **Figure 5 – Differentially expressed genes (DEGs) and tissue immune phenotype. A)** MA

817 plot showing the distribution of significantly differentially expressed genes between CRC tissue

818 with high and low bacterial activity. Coloring highlights the 20 most significant DEGs with an

819 adjusted p-value less than 0.05 and absolute log<sub>2</sub> fold-change >2. **B)** The Kyoto Encyclopedia of

820 Genes and Genomes (KEGG), Pathway Interaction Database (PID), and REACTOME (a

821 database of reactions, pathways, and biological processes) databases were used to identify

822 pathways that were significantly enriched or decreased in CRC tissue with high and low  
823 bacterial activity. **C+D)** Heatmaps showing immune cell profiles in CRC, healthy, and paired  
824 normal tissue, presented as fractions from the quantiseq, epic, and estimate immune scoring  
825 systems (C) and normalized scores from the concensus\_tme, xcell, mcp\_counter, and timer  
826 immune scoring systems (D). Coloring from yellow (-4) to purple (4) indicates the degree of  
827 infiltration, where purple is high infiltration. **E)** Four immune cell profile clusters were defined  
828 (Clus1-Clus4) in this study based on the hierarchical clustering of samples according to immune  
829 cell infiltration in the heatmaps. Y and N indicate whether samples were stable to the assigned  
830 clusters.

831

## 832 **SUPPLEMENTAL INFORMATION LEGENDS**

833 **Table S1 - Characteristics of included patients with CRC and healthy persons.** ASA,  
834 American Society of Anesthesiologists. BMI, Body Mass Index ( $\text{Kg}/\text{m}^2$ ). DM, Diabetes  
835 mellitus. \*Current and previous smoking has been pooled for statistical analysis. Continuous data  
836 were tested with a two-sided student t-test or Mann-Whitney test, and categorical data were  
837 tested with a chi-square test. A p-value  $\leq 0.05$  was considered statistically significant.

838

839 **Table S2 – Bacterial counts impacting specific immune cells across the seven methods that**  
840 **score immune cell infiltration.** NA = Not applicable because the method does not report that  
841 type of immune cell. ns = not significant. \* =  $p < 0.05$ , \*\* =  $p < 0.01$ , \*\*\*  $p < 0.001$ , \*\*\*\*  $p < 0.0001$ .  
842 Statistical comparison was carried out with Ordinary Least Squares regression to determine  
843 which independent variables (sample type, bacterial count, read count) explain the dependent  
844 outcome variable (the immune score). Highlighted rows indicate immune cell sub-populations

845 only affected in CRC tissue by bacterial counts. A p-value  $\leq 0.05$  was considered statistically  
846 significant.

847

848 **Table S3 – *Bacteroides fragilis* impacting specific immune cells across the seven methods**

849 **that score immune cell infiltration.** NA = Not applicable because the method does not report  
850 that type of immune cell. ns = not significant. \* =  $p < 0.05$ . Statistical comparison was carried out  
851 with Ordinary Least Squares regression to determine which independent variables (sample type,  
852 bacterial count, read count) explain the dependent outcome variable (the immune score).

853 Highlighted rows indicate immune cell sub-populations only affected in CRC tissue by bacterial  
854 counts. A p-value  $\leq 0.05$  was considered statistically significant.

855

856 **Table S4 – *Fusobacterium nucleatum* impacting specific immune cells across the seven**

857 **methods that score immune cell infiltration.** NA = Not applicable because the method does  
858 not report that type of immune cell. ns = not significant. Statistical comparison was carried out  
859 with Ordinary Least Squares regression to determine which independent variables (sample type,  
860 bacterial count, read count) explain the dependent outcome variable (the immune score). A p-  
861 value  $\leq 0.05$  was considered statistically significant.

862

863 **Table S5 – Bacterial counts impacting specific immune cells across the seven methods that**  
864 **score immune cell infiltration, excluding paired normal samples from the control group.**

865 NA = Not applicable because the method does not report that type of immune cell. ns = not  
866 significant. \* =  $p < 0.05$ , \*\* =  $p < 0.01$ , \*\*\* =  $p < 0.001$ , \*\*\*\* =  $p < 0.0001$ . Statistical comparison was  
867 carried out with Ordinary Least Squares regression to determine which independent variables

868 (sample type, bacterial count, read count) explain the dependent outcome variable (the immune  
869 score). Highlighted rows indicate immune cell sub-populations only affected in CRC tissue by  
870 bacterial counts. A p-value  $\leq 0.05$  was considered statistically significant.

871

872 **Table S6 – *Bacteroides fragilis* impacting specific immune cells across the seven methods**  
873 **that score immune cell infiltration excluding paired normal samples from the control**

874 **group.** NA = Not applicable because the method does not report that type of immune cell. ns =  
875 not significant. \* =  $p < 0.05$ , \*\* =  $p < 0.01$ , \*\*\*  $p < 0.001$ . Statistical comparison was carried out  
876 with Ordinary Least Squares regression to determine which independent variables (sample type,  
877 bacterial count, read count) explain the dependent outcome variable (the immune score).

878 Highlighted rows indicate immune cell sub-populations only affected in CRC tissue by bacterial  
879 counts. A p-value  $\leq 0.05$  was considered statistically significant.

880

881 **Table S7 – *Fusobacterium nucleatum* impacting specific immune cells across the seven**  
882 **methods that score immune cell infiltration excluding paired normal samples from the**

883 **control group.** NA = Not applicable because the method does not report that type of immune  
884 cell. ns = not significant. \* =  $p < 0.05$ . Statistical comparison was carried out with Ordinary Least  
885 Squares regression to determine which independent variables (sample type, bacterial count, read  
886 count) explain the dependent outcome variable (the immune score). A p-value  $\leq 0.05$  was  
887 considered statistically significant.

888

889 **Figure S1 - Noise filtering and distribution of counts assigned to Eukaryota, bacteria,**

890 **archaea, viruses, *Fusobacterium nucleatum*, and *Bacteroides fragilis*.** A) Histogram showing

891 the counts distribution over log-10 transformed scaled counts. The red arrow indicates the  
892 intersection between the populations, and all scaled counts  $< \log_{10} 0.9$  (indicated by red arrow)  
893 were set to 0 to remove noise. **B+C+D+E+F+G**) Normal distribution of scaled kingdom counts  
894 (y-axis) presented per sample across groups for Eukaryota (A), Bacteria (B), Archaea (C), virus  
895 (D), *F. nucleatum* (F), and *B. fragilis* (G).

896

897 **Figure S2 - bacterial biomass was not associated with tumour staging, lymph node**  
898 **metastasis, or distant metastasis.** **A)** Logarithmic (log) transformed bacterial biomass  
899 measured in cubic micrometers ( $\mu\text{m}^3$ ) according to tumour stage (T1-4). **B+C+D)** Log-  
900 transformed bacterial biomass measured in  $\mu\text{m}^3$  according to distant (B) metastasis (M), Lymph  
901 node (C) metastasis (N), or both (D). All biomass measurements were measured with the Imaris  
902 software through thresholding of fluorescence intensity. **E+F+G)** Prevalence of *Fusobacterium*  
903 *spp.* compared with the number of patients with distant (E) metastasis (M), Lymph node (F)  
904 metastasis (N), or both (G). **H+I)** Prevalence of *Bacteroides fragilis* compared with the number  
905 of patients with lymph node (H) metastasis (N) or distant (I) metastasis (M). **J+K)** Number of  
906 patients and tumour staging (T1-4) compared to the prevalence of *B. fragilis* (J) and  
907 *Fusobacterium spp.* (K). Statistical comparison was carried out with one-way ANOVA (**A**),  
908 unpaired t-test (**B+C**), Fisher's exact t-test (**A+B+C+D**), and chi-square test (**E+F**). Bars  
909 represent standard deviation (SD); a p-value  $\leq 0.05$  was considered statistically significant.

910

911 **Figure S3 - Principal-component analysis of normalized expression data.** **A+B)** The  
912 clustering of CRC, healthy, and paired normal tissue samples according to sequencing depth  
913 (deep vs. shallow) is presented as a heatmap (A) and 2D scatterplot (B). **C)** All data is colored

914 according to groups. **D)** All data is colored according to sequencing depth. **E)** CRC samples are  
915 colored by sequencing depth. **F)** CRC samples are colored according to the presence of *F.*  
916 *nucleatum*. Samples with high *F. nucleatum* counts were defined as those samples departing  
917 from the normal distribution in Figure S1, whereas low were those that followed the normal  
918 distribution. **G)** CRC samples are colored according to the presence of *B. fragilis*. Samples with  
919 high *B. fragilis* counts were defined as those departing from the normal distribution in Figure S1,  
920 whereas low were those following the normal distribution.

921

922 **Figure S4 - Differentially expressed genes and enriched biological pathways in CRC and**  
923 **non-CRC. A)** MA plot showing the distribution of significantly differentiated genes between  
924 CRC and Non-CRC (healthy and paired samples). Coloring highlights the 20 most significant  
925 DEGs with an adjusted p-value less than 0.05 and absolute log<sub>2</sub> fold-change >2. Coloring  
926 highlights genes with an adjusted p-value less than 0.05 and absolute log<sub>2</sub> fold-change >2. **B)**  
927 Pathways demonstrating significant enrichment of differentially expressed genes (Fishers exact  
928 test) for CRC or non-CRC. The Kyoto Encyclopedia of Genes and Genomes (KEGG), Pathway  
929 Interaction Database (PID), and REACTOME (a database of reactions, pathways, and biological  
930 processes) databases were used to identify pathways.

931

932 **Figure S5 - Clustering of samples according to immune cell infiltration 2. A+B)** Heatmaps  
933 showing immune cell profiles in CRC and healthy tissue, presented as normalized scores from  
934 the consensus\_tme, xcell, mcp\_counter, and timer immune scoring systems (A), and fractions  
935 from the quantiseq, epic, and estimate immune scoring systems (B). Coloring from yellow (-4) to  
936 purple (4) indicates the degree of infiltration, where purple is high infiltration.

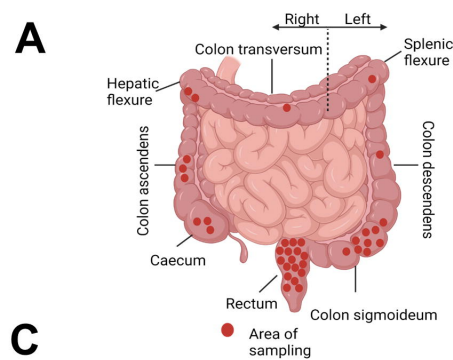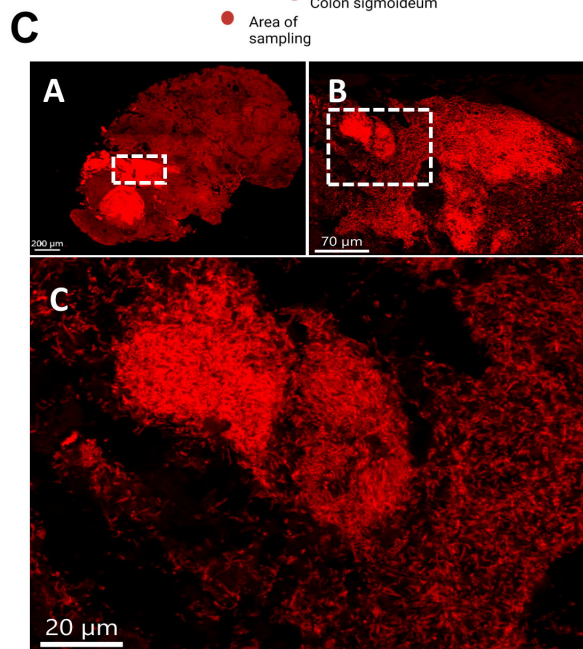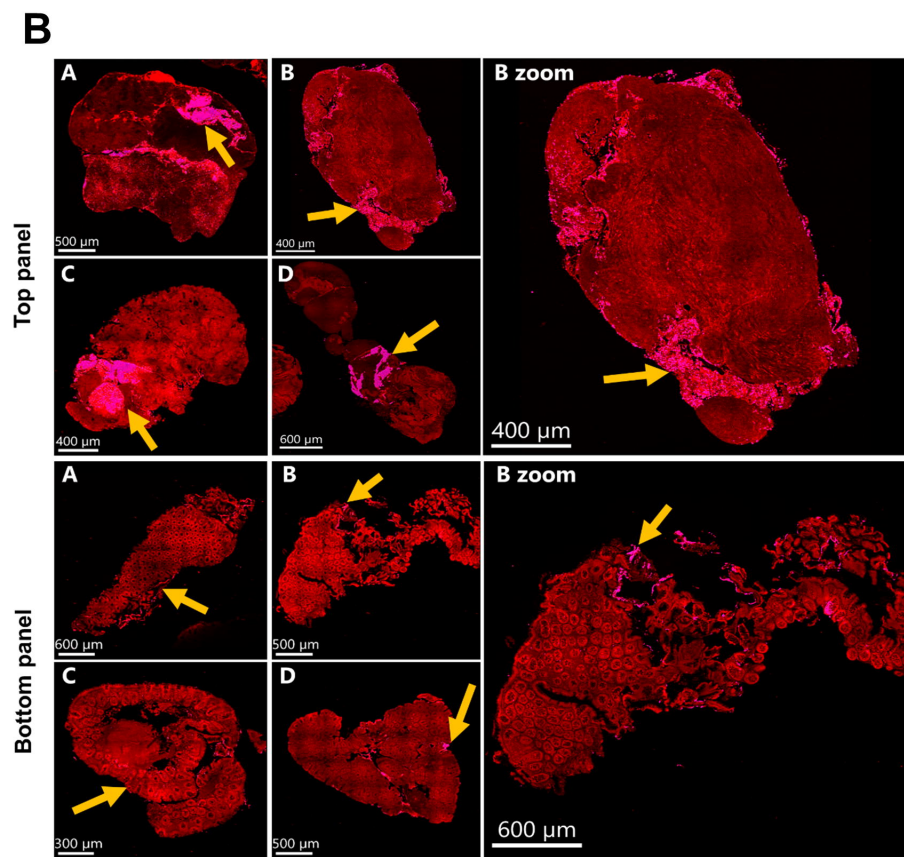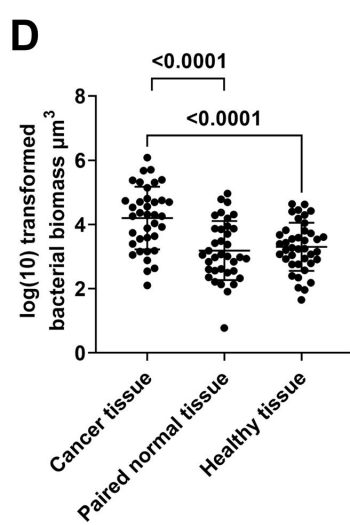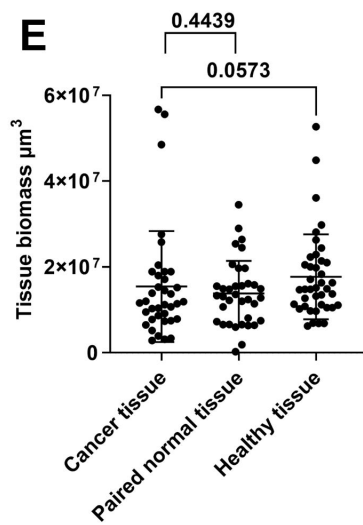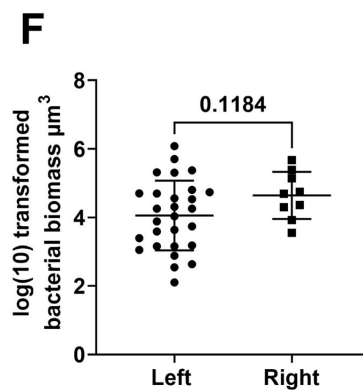



**A**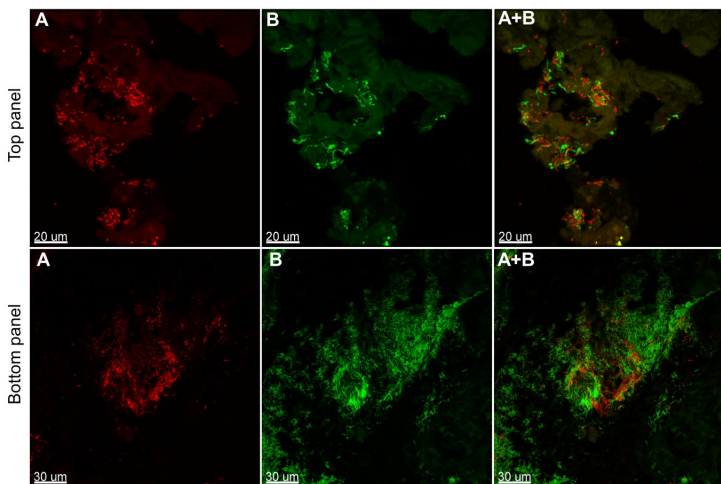**E**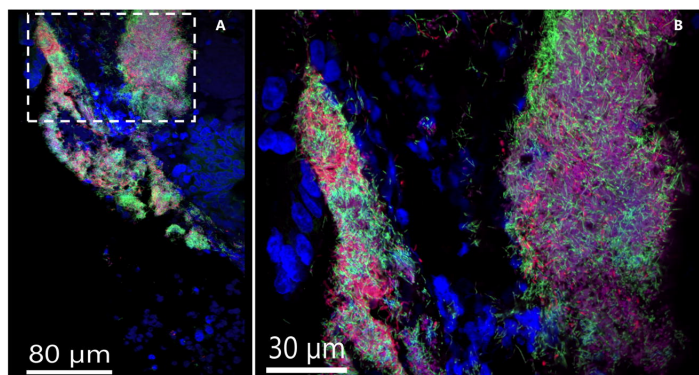**B**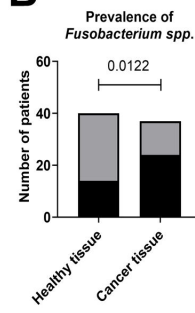**C**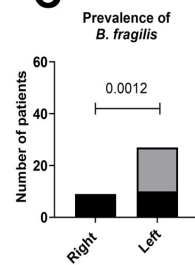**D**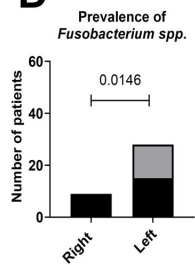

■ Bacteria present  
□ Bacteria not present

**F**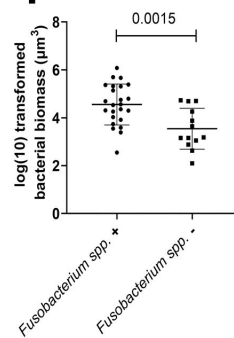**G**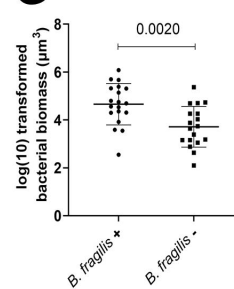**H**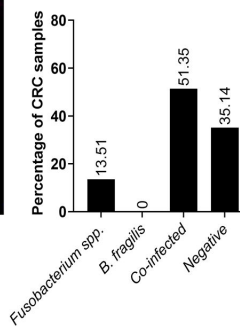**I**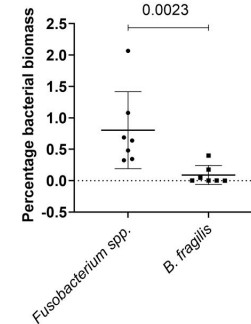**J**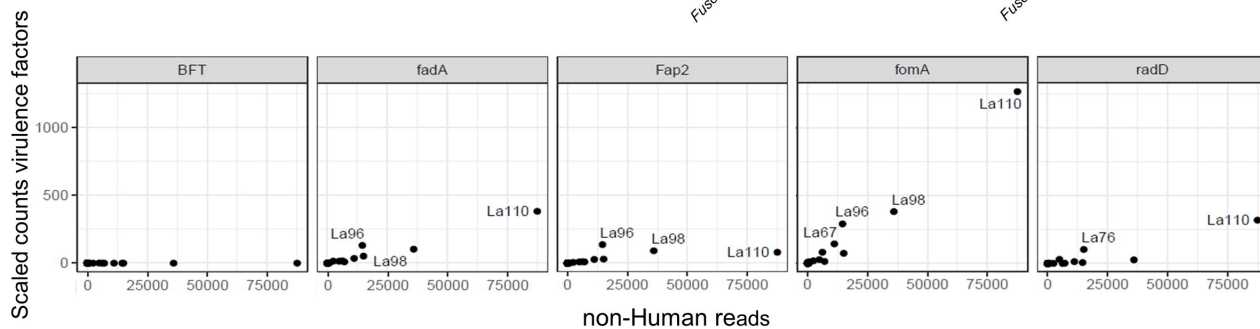

CRC group

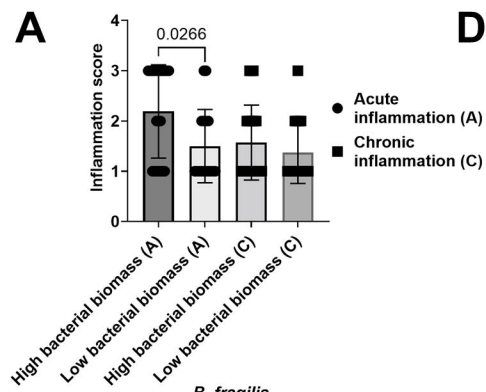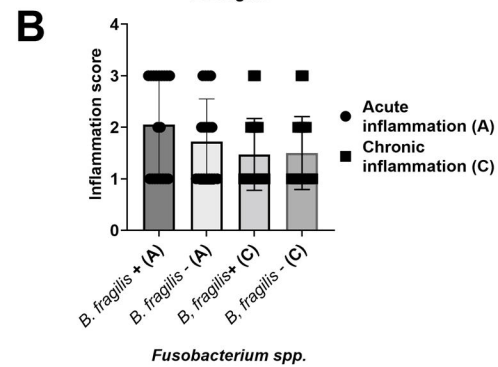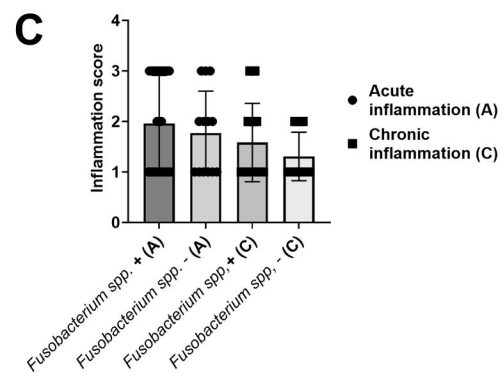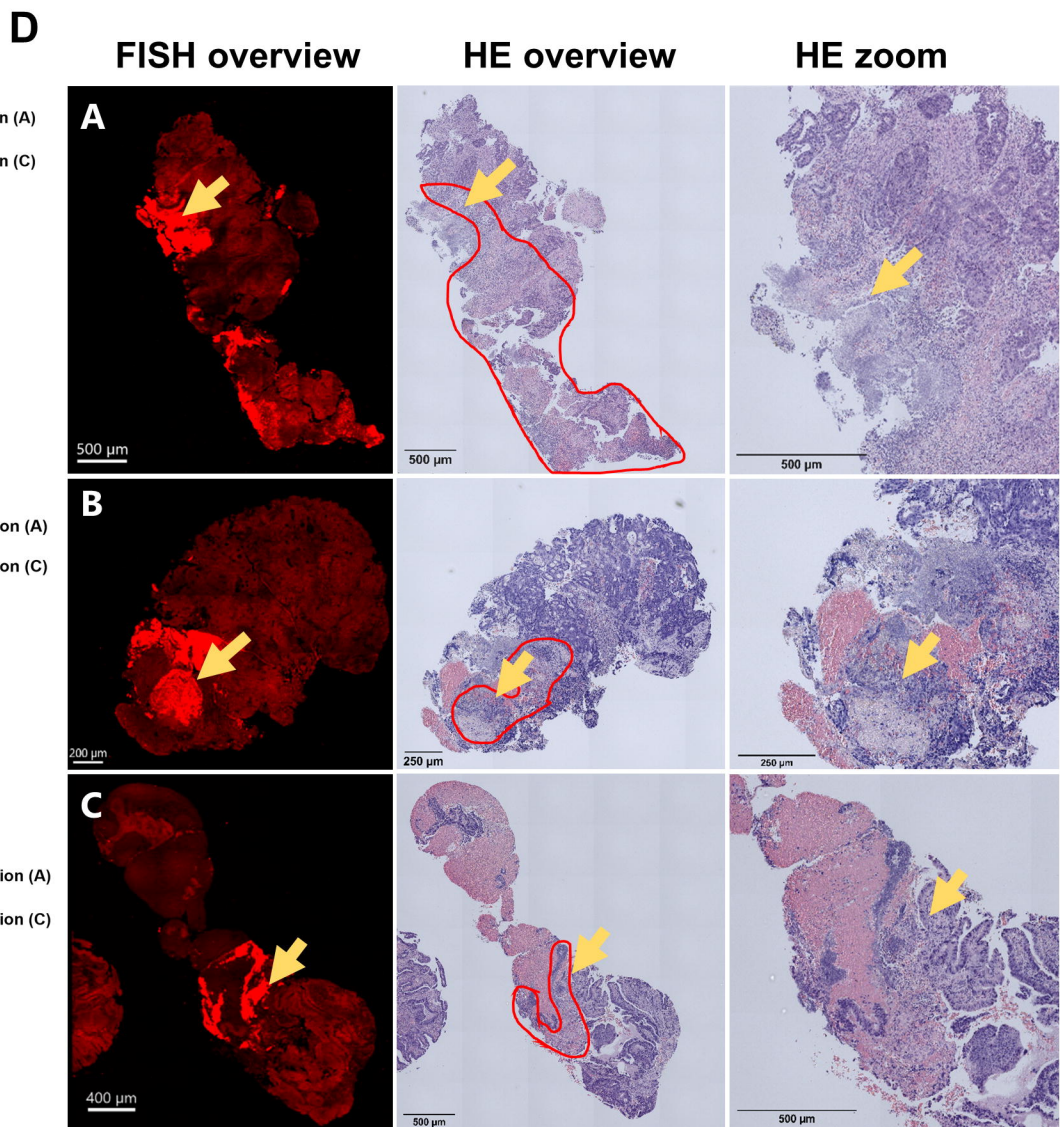

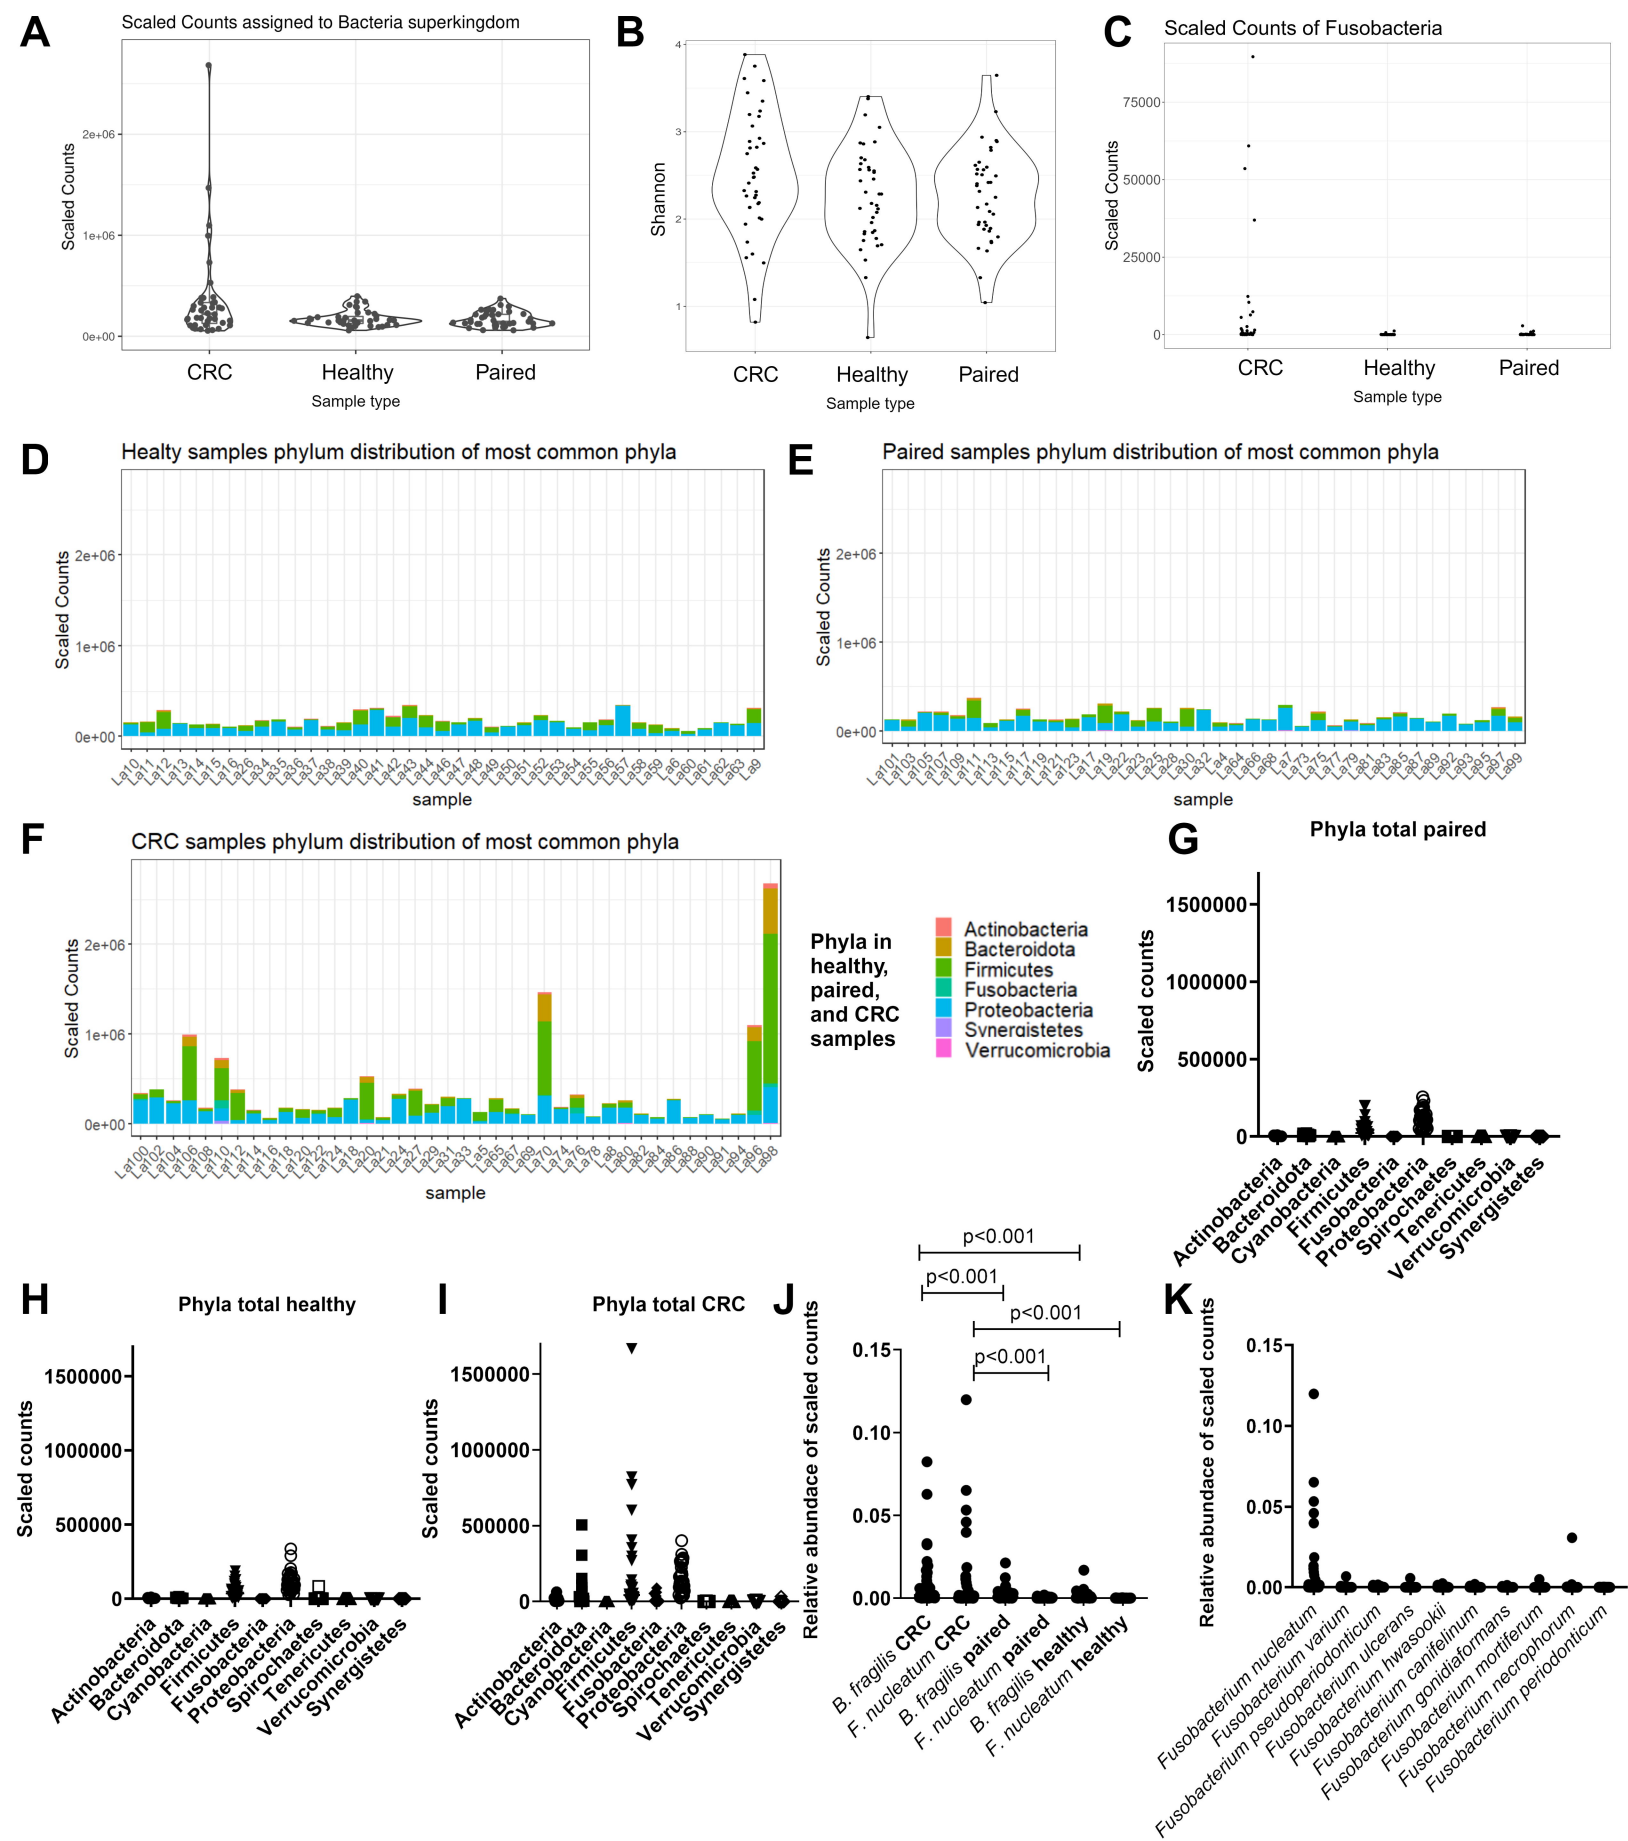

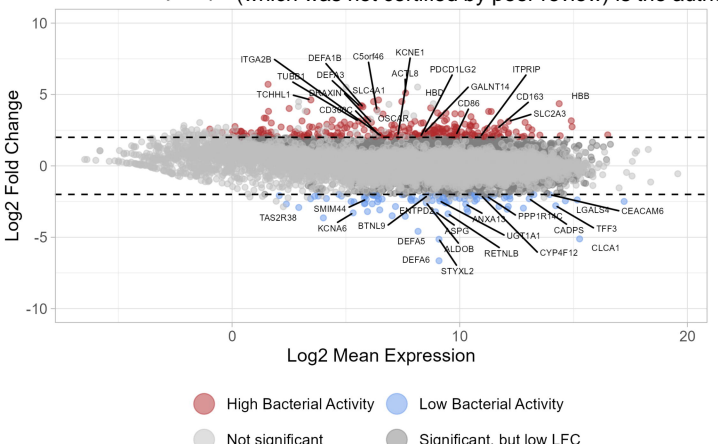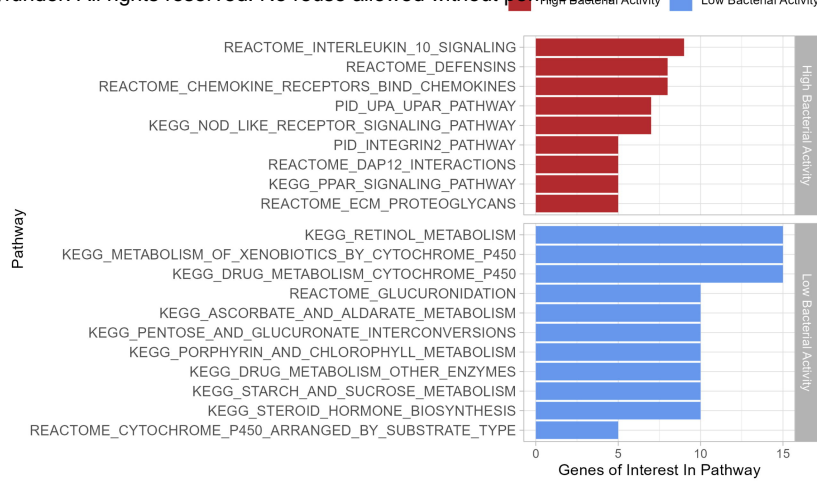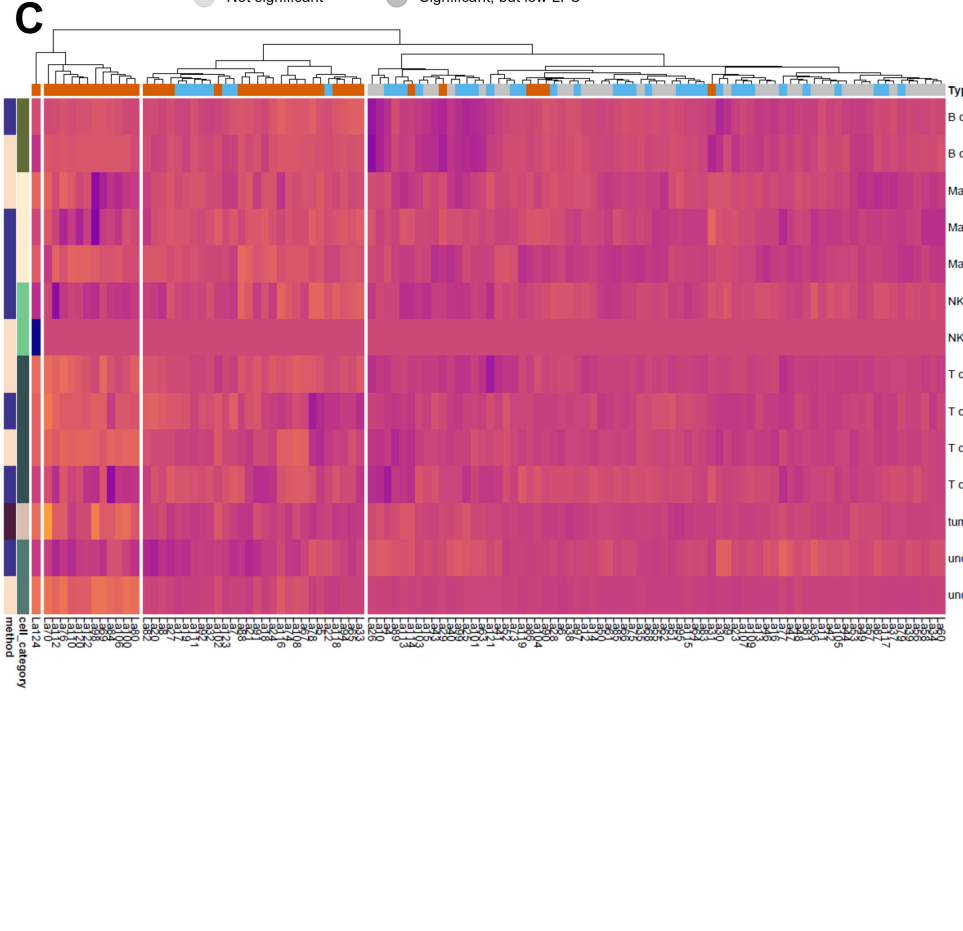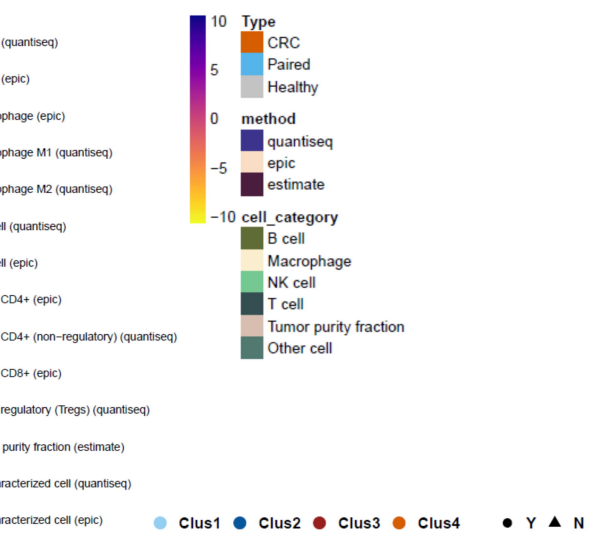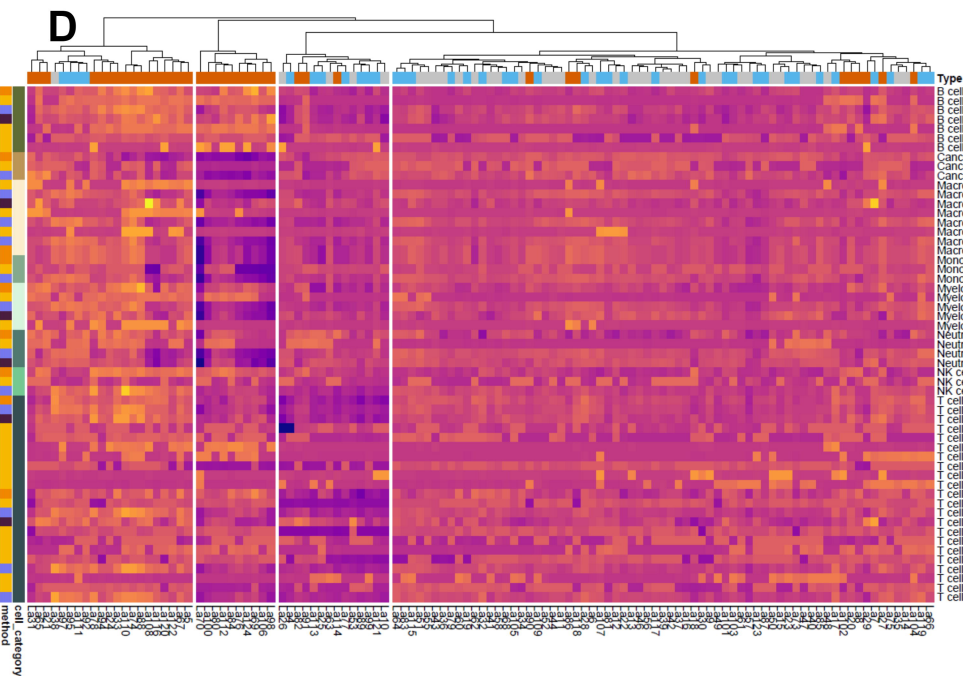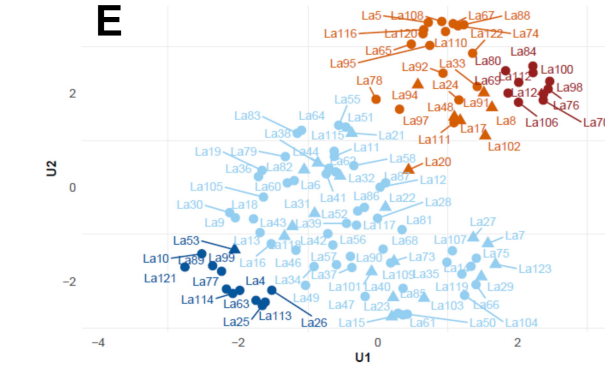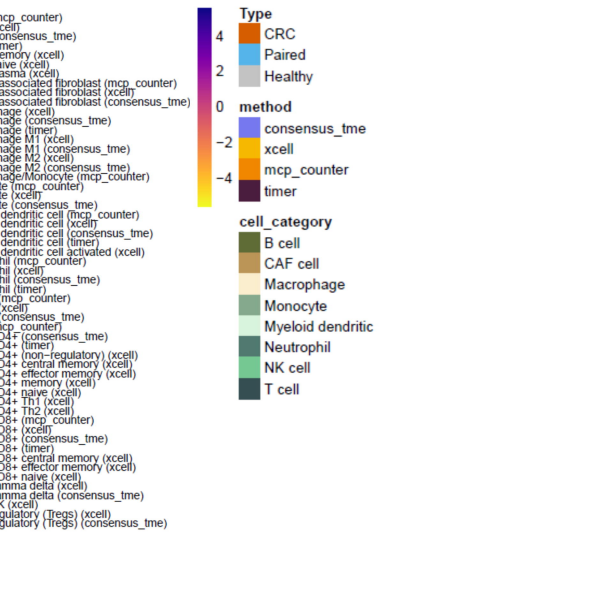

Source: https://www.biorxiv.org/content/10.1101/2023.10.20.563034.full.pdf
